# Supplementary material for: Cancer stem cell activity of copper(ii)-terpyridine complexes with aryl sulfonamide groups
Source: Royal Society of Chemistry journal article supplement (doi:10.1039/d3dt01294h), 2023-01-01
Supplement: d3dt01294h1.pdf [file d3dt01294h1.pdf]

## Supporting Information for

# Cancer stem cell activity of copper(II)-terpyridine complexes with sulfonamide groups

Karampal Singh,<sup>a†</sup> Joshua Northcote-Smith,<sup>a†</sup> Kuldip Singh,<sup>a</sup> and Kogularamanan Suntharalingam<sup>a\*</sup>

<sup>a</sup> School of Chemistry, University of Leicester, Leicester, LE1 7RH, United Kingdom;

<sup>†</sup> These authors contributed equally to this work

\* To whom correspondence should be addressed:

Email: k.suntharalingam@leicester.ac.uk

### Table of Content

#### Experimental Details

- Figure S1.** The reaction scheme for the preparation of terpyridine ligands containing various aryl sulfonamide groups **L**<sup>1</sup>-**L**<sup>5</sup>.
- Figure S2.** <sup>1</sup>H NMR spectrum of 2-([2,2':6',2''-terpyridin]-4'-yloxy)ethan-1-amine in CDCl<sub>3</sub>.
- Figure S3.** <sup>13</sup>C{<sup>1</sup>H} NMR spectrum of 2-([2,2':6',2''-terpyridin]-4'-yloxy)ethan-1-amine in CDCl<sub>3</sub>.
- Figure S4.** <sup>1</sup>H NMR spectrum of **L**<sup>1</sup> in CDCl<sub>3</sub>.
- Figure S5.** <sup>13</sup>C{<sup>1</sup>H} NMR spectrum of **L**<sup>1</sup> in CDCl<sub>3</sub>.
- Figure S6.** <sup>1</sup>H NMR spectrum of **L**<sup>2</sup> in CDCl<sub>3</sub>.
- Figure S7.** <sup>13</sup>C{<sup>1</sup>H} NMR spectrum of **L**<sup>2</sup> in CDCl<sub>3</sub>.
- Figure S8.** <sup>1</sup>H NMR spectrum of **L**<sup>3</sup> in CDCl<sub>3</sub>.
- Figure S9.** <sup>13</sup>C{<sup>1</sup>H} NMR spectrum of **L**<sup>3</sup> in CDCl<sub>3</sub>.
- Figure S10.** <sup>1</sup>H NMR spectrum of **L**<sup>4</sup> in CDCl<sub>3</sub>.
- Figure S11.** <sup>13</sup>C{<sup>1</sup>H} NMR spectrum of **L**<sup>4</sup> in CDCl<sub>3</sub>.
- Figure S12.** <sup>19</sup>F{<sup>1</sup>H} NMR spectrum of **L**<sup>4</sup> in CDCl<sub>3</sub>.
- Figure S13.** <sup>1</sup>H NMR spectrum of **L**<sup>5</sup> in CDCl<sub>3</sub>.
- Figure S14.** <sup>13</sup>C{<sup>1</sup>H} NMR spectrum of **L**<sup>5</sup> in DMSO-*d*<sub>6</sub>.
- Figure S15.** <sup>19</sup>F{<sup>1</sup>H} NMR spectrum of **L**<sup>5</sup> in CDCl<sub>3</sub>.
- Figure S16.** ATR-FTIR spectra of (A) 2-([2,2':6',2''-terpyridin]-4'-yloxy)ethan-1-amine, (B) **L**<sup>1</sup>, (C) **L**<sup>2</sup>, (D) **L**<sup>3</sup>, (E) **L**<sup>4</sup>, (F) **L**<sup>5</sup> in the solid form.
- Figure S17.** High-resolution ESI-MS mass spectrum (positive mode) of 2-([2,2':6',2''-terpyridin]-4'-yloxy)ethan-1-amine.

- Figure S18.** High-resolution ESI-MS mass spectrum (positive mode) of **L**<sup>1</sup>.
- Figure S19.** High-resolution ESI-MS mass spectrum (positive mode) of **L**<sup>2</sup>.
- Figure S20.** High-resolution ESI-MS mass spectrum (positive mode) of **L**<sup>3</sup>.
- Figure S21.** High-resolution ESI-MS mass spectrum (positive mode) of **L**<sup>4</sup>.
- Figure S22.** High-resolution ESI-MS mass spectrum (positive mode) of **L**<sup>5</sup>.
- Figure S23.** ATR-FTIR spectra of (A) **1**, (B) **2**, (C) **3**, (D) **4**, (E) **5** in the solid form.
- Figure S24.** High-resolution ESI-MS mass spectrum (positive mode) of **1**.
- Figure S25.** High-resolution ESI-MS mass spectrum (positive mode) of **2**.
- Figure S26.** High-resolution ESI-MS mass spectrum (positive mode) of **3**.
- Figure S27.** High-resolution ESI-MS mass spectrum (positive mode) of **4**.
- Figure S28.** High-resolution ESI-MS mass spectrum (positive mode) of **5**.
- Table S1.** Crystallographic data for complexes **1-3**.
- Table S2.** Crystallographic data for complexes **4-5**.
- Table S3.** Selected bond lengths (Å) for complexes **1-5**.
- Table S4.** Selected bond angles (°) for complexes **1-5**.
- Table S5.** Experimentally determined LogP values for copper(II)-terpyridine complexes **1-5** and Cu(2,2';6',2"-terpyridine)Cl<sub>2</sub>.
- Figure S29.** UV-Vis spectra of **1-5** (A-E) (all 50 μM) in PBS:DMSO (200:1) over the course of 24 h at 37 °C.
- Figure S30.** UV-Vis spectra of **1-5** (A-E) (all 50 μM) in H<sub>2</sub>O:DMSO (200:1) over the course of 24 h at 37 °C.
- Figure S31.** UV-Vis spectra of **1-5** (A-E) (all 50 μM) in PBS:DMSO (200:1) in the presence of ascorbic acid (0.5 mM) over the course of 24 h at 37 °C.
- Figure S32.** ESI mass spectra (positive mode) of **1** (500 μM) in H<sub>2</sub>O:DMSO (5:1) in the presence of (A) ascorbic acid (5 mM) or (B) glutathione (5 mM) after incubation for 24 h at 37 °C.
- Figure S33.** ESI mass spectra (positive mode) of **2** (500 μM) in H<sub>2</sub>O:DMSO (5:1) in the presence of (A) ascorbic acid (5 mM) or (B) glutathione (5 mM) after incubation for 24 h at 37 °C.
- Figure S34.** ESI mass spectra (positive mode) of **3** (500 μM) in H<sub>2</sub>O:DMSO (5:1) in the presence of (A) ascorbic acid (5 mM) or (B) glutathione (5 mM) after incubation for 24 h at 37 °C.
- Figure S35.** ESI mass spectra (positive mode) of **4** (500 μM) in H<sub>2</sub>O:DMSO (5:1) in the presence of (A) ascorbic acid (5 mM) or (B) glutathione (5 mM) after incubation for 24 h at 37 °C.
- Figure S36.** ESI mass spectra (positive mode) of **5** (500 μM) in H<sub>2</sub>O:DMSO (5:1) in the presence of (A) ascorbic acid (5 mM) or (B) glutathione (5 mM) after incubation for 24 h at 37 °C.
- Figure S37.** UV-Vis spectra of **1-5** (A-E) (all 50 μM) in Mammary Epithelial Cell Growth Medium (MEGM):DMSO (200:1) over the course of 24 h at 37 °C.
- Figure S38.** UV-Vis spectra of **1** (0.5 mM) in (A) PBS:DMSO (10:1) and (B) Mammary Epithelial Cell Growth Medium (MEGM):DMSO (10:1) before and after incubation at 37 °C for 24 h.
- Figure S39.** Representative dose-response curves for the treatment of HMLER and HMLER-shEcad cells with **1** after 72 h incubation.
- Figure S40.** Representative dose-response curves for the treatment of HMLER and HMLER-shEcad cells with **2** after 72 h incubation.
- Figure S41.** Representative dose-response curves for the treatment of HMLER and HMLER-shEcad cells with **3** after 72 h incubation.

- Figure S42.** Representative dose-response curves for the treatment of HMLER and HMLER-shEcad cells with **4** after 72 h incubation.
- Figure S43.** Representative dose-response curves for the treatment of HMLER and HMLER-shEcad cells with **5** after 72 h incubation.
- Figure S44.** Representative dose-response curves for the treatment of HMLER and HMLER-shEcad cells with gemcitabine after 72 h incubation.
- Table S6.** IC<sub>50</sub> values of the gemcitabine, 5-fluorouracil, capecitabine, and carboplatin against HMLER and HMLER-shEcad cells. <sup>a</sup> Determined after 72 h incubation (mean of three independent experiments ± SD). <sup>b</sup> Reported in reference [1].
- Figure S45.** Representative dose-response curves for the treatment of HMLER and HMLER-shEcad cells with **L**<sup>1</sup> after 72 h incubation.
- Figure S46.** Representative dose-response curves for the treatment of HMLER and HMLER-shEcad cells with copper nitrate after 72 h incubation.
- Figure S47.** Representative dose-response curves for the treatment of HMLER and HMLER-shEcad cells with Cu(2,2';6',2''-terpyridine)Cl<sub>2</sub> after 72 h incubation.
- Figure S48.** Representative dose-response curves for the treatment of HMLER-shEcad cells with **L**<sup>1</sup> + CuCl<sub>2</sub> (1:1) after 72 h incubation.
- Figure S49.** Representative bright-field images (× 10) of HMLER-shEcad spheroids in the absence and presence of salinomycin or cisplatin at their IC<sub>20</sub> value (5 days incubation).
- Figure S50.** Representative bright-field images (× 10) of HMLER-shEcad spheroids in the absence and presence of Cu(2,2';6',2''-terpyridine)Cl<sub>2</sub> at its IC<sub>20</sub> value (5 days incubation).
- Figure S51.** Representative dose-response curves for the treatment of HMLER-shEcad mammospheres with **1-5** or Cu(2,2';6',2''-terpyridine)Cl<sub>2</sub> after 5 days incubation. Error bars = SD.
- Figure S52.** FITC Annexin V-propidium iodide binding assay plots of (A) untreated HMLER-shEcad cells and (B) HMLER-shEcad cells treated with cisplatin (25 μM for 48 h).
- Figure S53.** Immunoblotting analysis of proteins related to the apoptosis pathway. Protein expression in HMLER-shEcad cells untreated and treated with (A) **1** (0.4, 0.8, and 1.6 μM for 24 h) or (B) **1** (0.4, 0.8, and 1.6 μM for 48 h).

## Reference

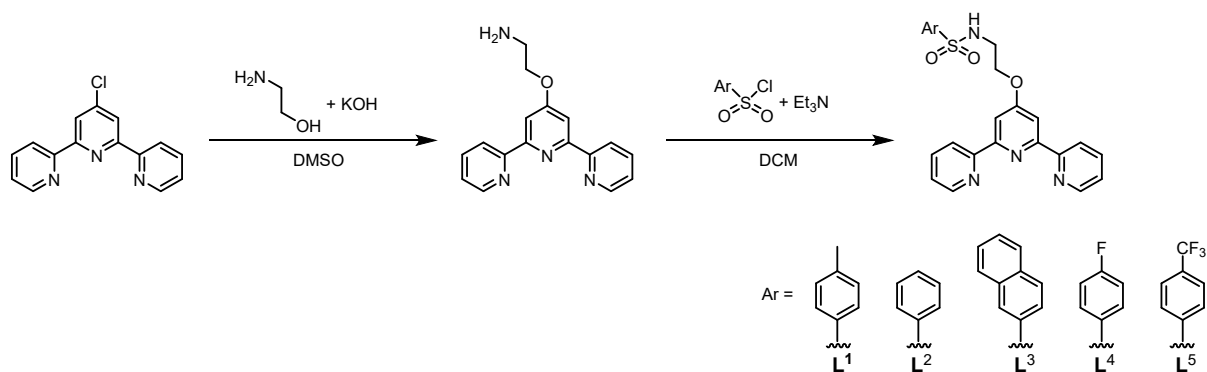

**Figure S1.** The reaction scheme for the preparation of terpyridine ligands containing various aryl sulfonamide groups **L<sup>1</sup>-L<sup>5</sup>**.

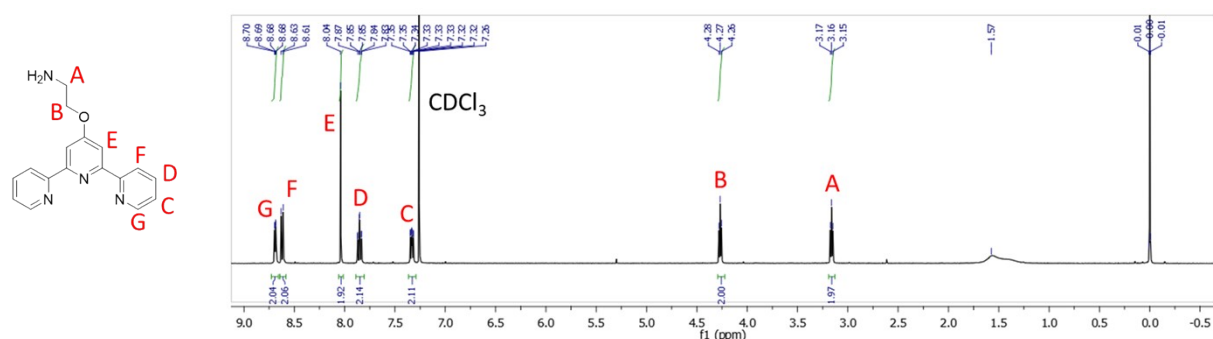

**Figure S2.**  $^1\text{H}$  NMR spectrum of 2-((2,2':6',2''-terpyridin)-4'-yloxy)ethan-1-amine in  $\text{CDCl}_3$ .

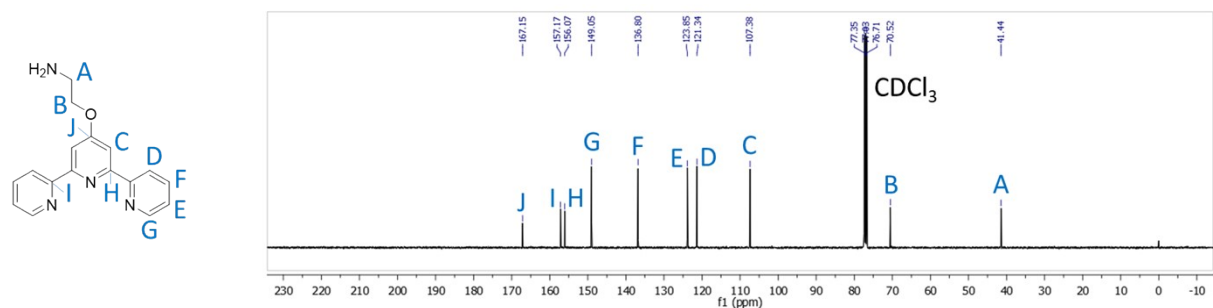

**Figure S3.**  $^{13}\text{C}\{^1\text{H}\}$  NMR spectrum of 2-((2,2':6',2''-terpyridin)-4'-yloxy)ethan-1-amine in  $\text{CDCl}_3$ .

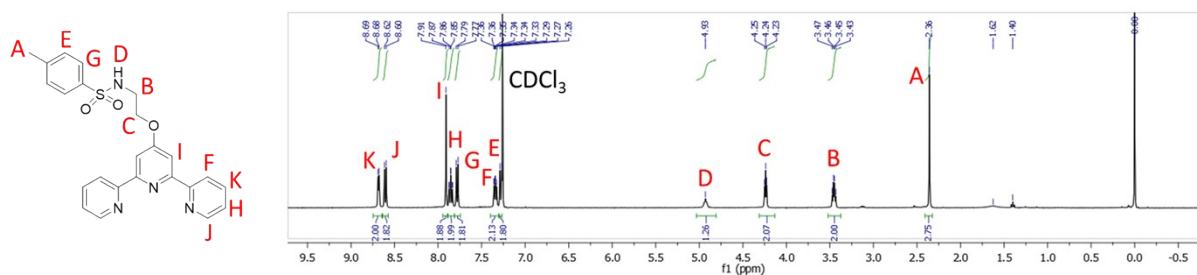

**Figure S4.**  $^1\text{H}$  NMR spectrum of **L<sup>1</sup>** in  $\text{CDCl}_3$ .

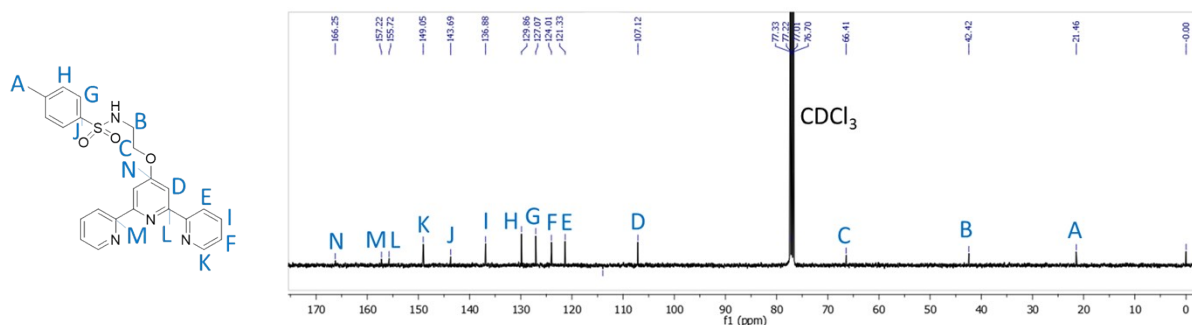

Figure S5.  $^{13}\text{C}\{^1\text{H}\}$  NMR spectrum of  $\text{L}^1$  in  $\text{CDCl}_3$ .

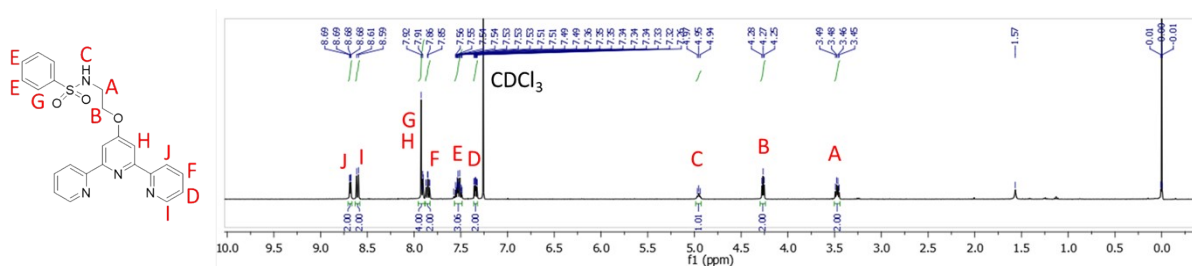

Figure S6.  $^1\text{H}$  NMR spectrum of  $\text{L}^2$  in  $\text{CDCl}_3$ .

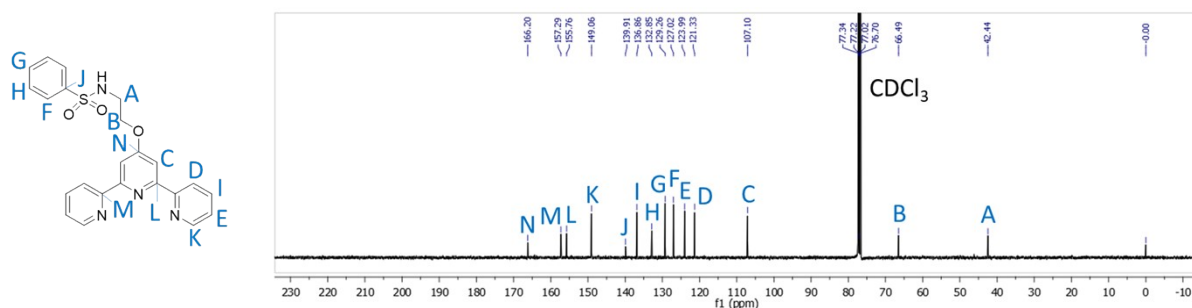

Figure S7.  $^{13}\text{C}\{^1\text{H}\}$  NMR spectrum of  $\text{L}^2$  in  $\text{CDCl}_3$ .

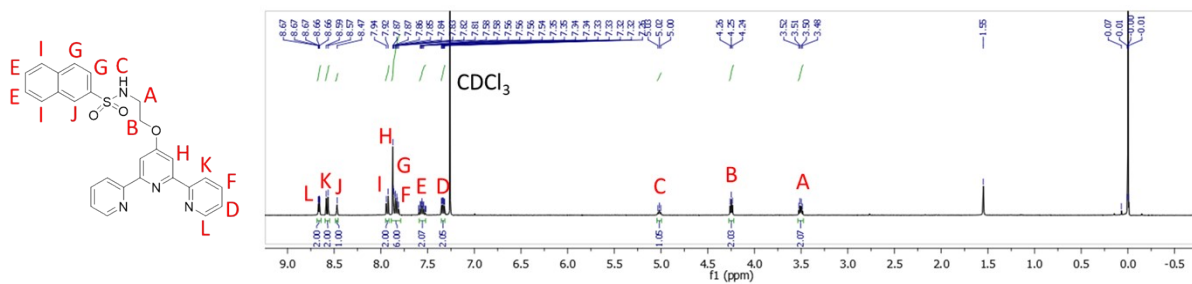

Figure S8.  $^1\text{H}$  NMR spectrum of  $\text{L}^3$  in  $\text{CDCl}_3$ .

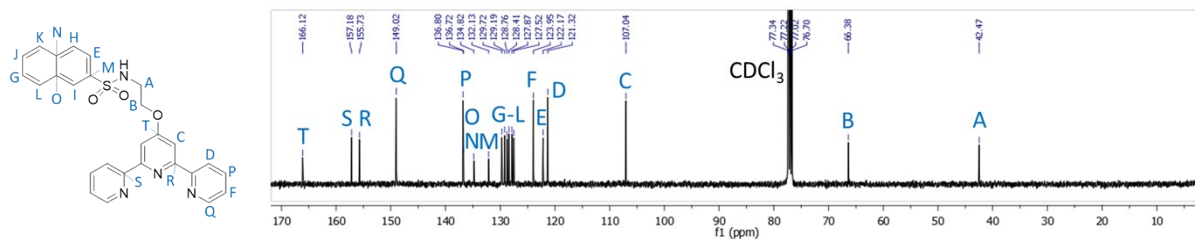

**Figure S9.**  $^{13}\text{C}\{^1\text{H}\}$  NMR spectrum of  $\text{L}^3$  in  $\text{CDCl}_3$ .

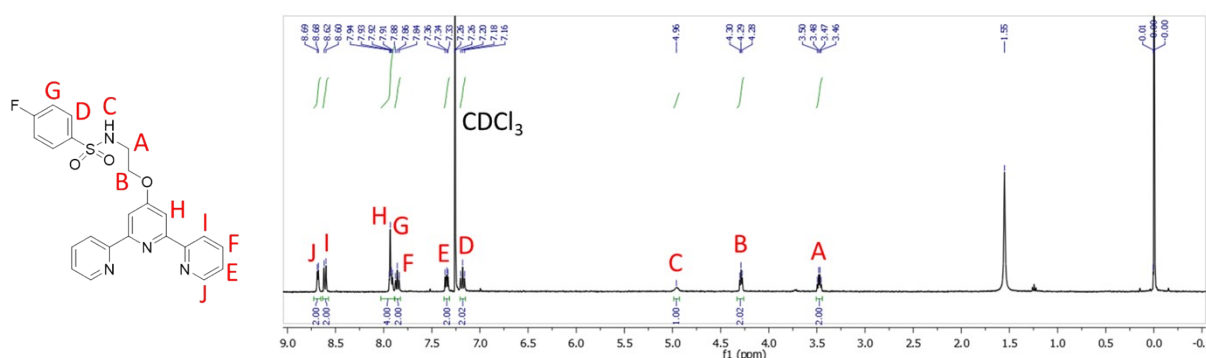

**Figure S10.**  $^1\text{H}$  NMR spectrum of  $\text{L}^4$  in  $\text{CDCl}_3$ .

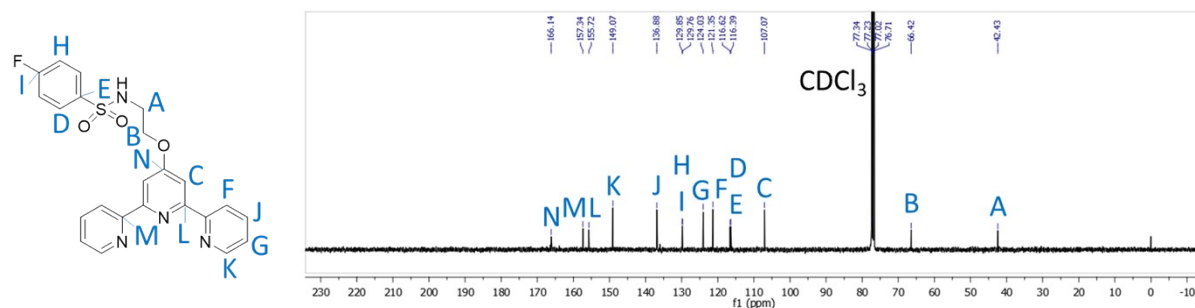

**Figure S11.**  $^{13}\text{C}\{^1\text{H}\}$  NMR spectrum of  $\text{L}^4$  in  $\text{CDCl}_3$ .

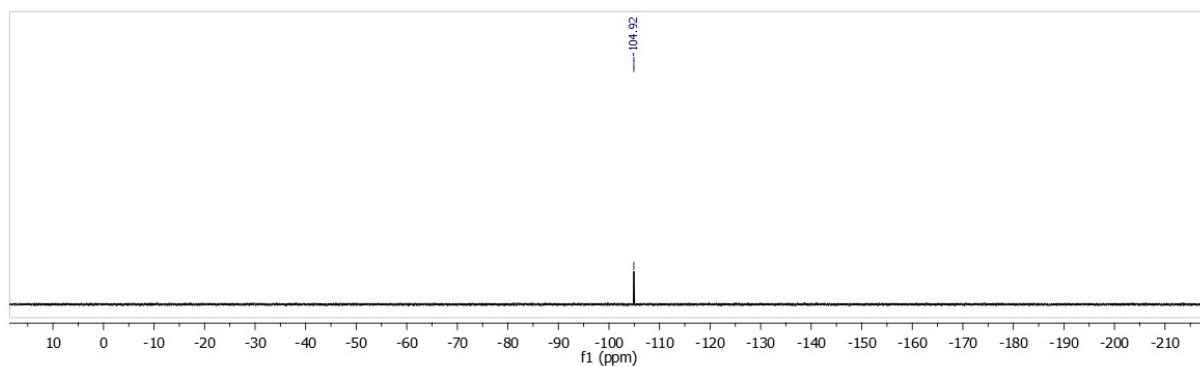

**Figure S12.**  $^{19}\text{F}\{^1\text{H}\}$  NMR spectrum of  $\text{L}^4$  in  $\text{CDCl}_3$ .

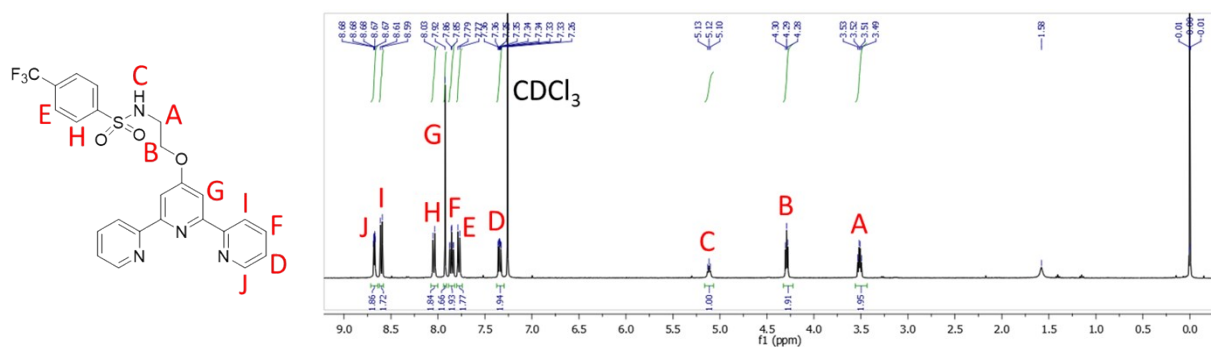

**Figure S13.**  $^1\text{H}$  NMR spectrum of  $\text{L}^5$  in  $\text{CDCl}_3$ .

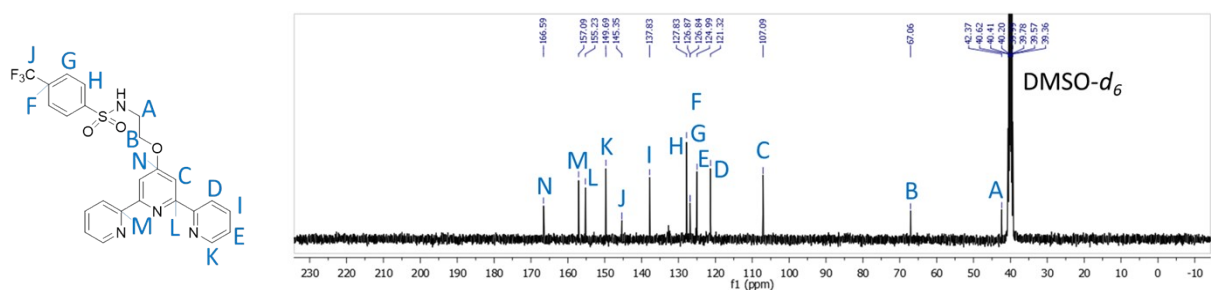

**Figure S14.**  $^{13}\text{C}\{^1\text{H}\}$  NMR spectrum of  $\text{L}^5$  in  $\text{DMSO}-d_6$ .

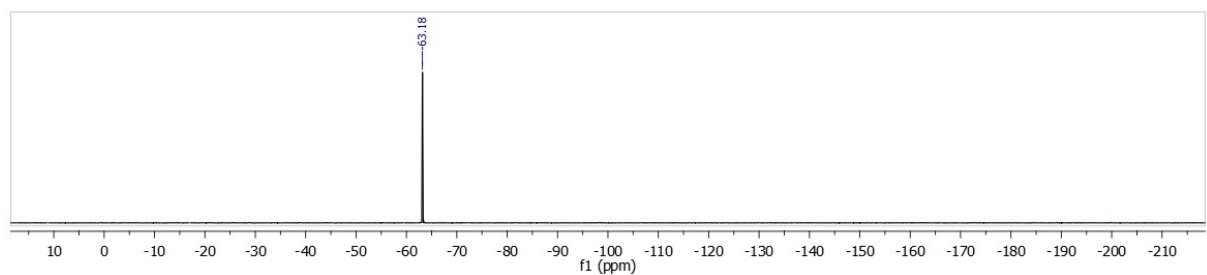

**Figure S15.**  $^{19}\text{F}\{^1\text{H}\}$  NMR spectrum of  $\text{L}^5$  in  $\text{CDCl}_3$ .

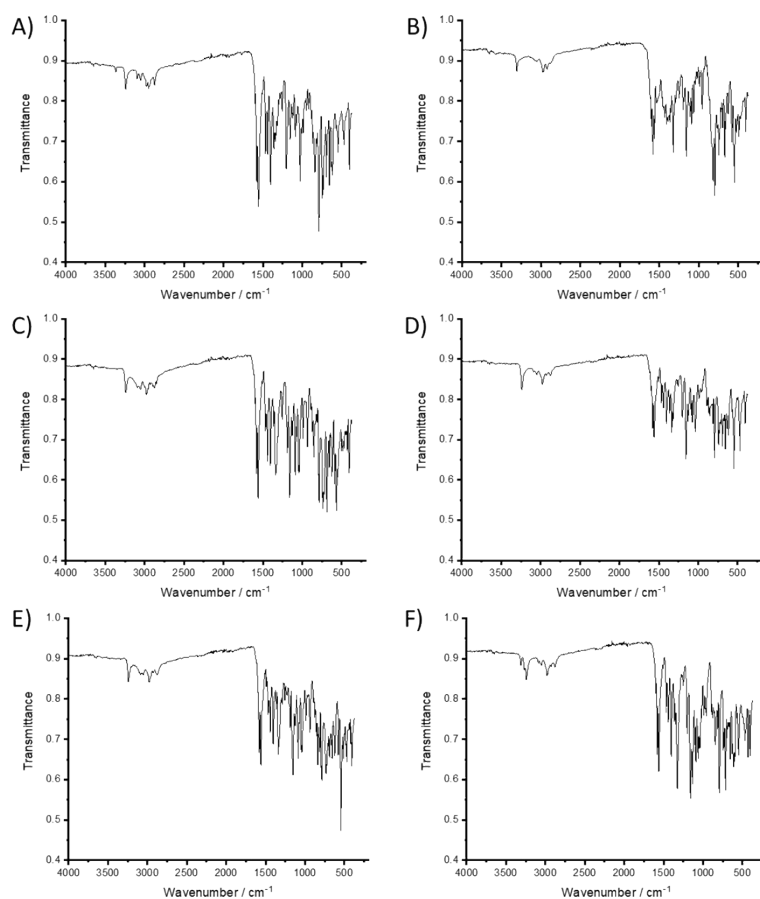

**Figure S16.** ATR-FTIR spectra of (A) 2-([2,2':6',2''-terpyridin]-4'-yloxy)ethan-1-amine, (B) L<sup>1</sup>, (C) L<sup>2</sup>, (D) L<sup>3</sup>, (E) L<sup>4</sup>, (F) L<sup>5</sup> in the solid form.

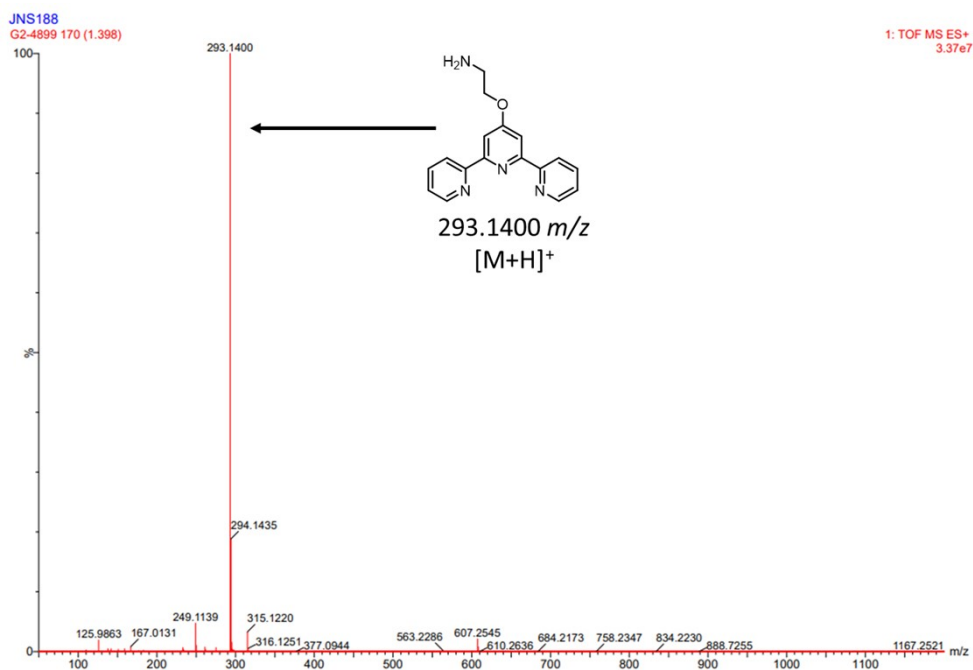

**Figure S17.** High-resolution ESI-MS mass spectrum (positive mode) of 2-([2,2':6',2''-terpyridin]-4'-yloxy)ethan-1-amine.



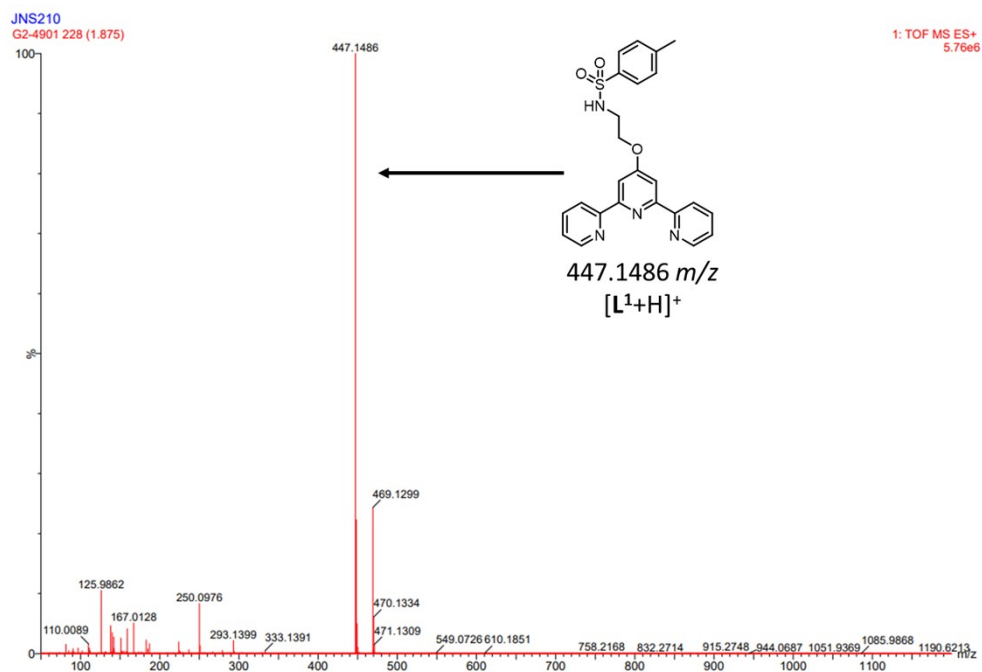

**Figure S18.** High-resolution ESI-MS mass spectrum (positive mode) of L<sup>1</sup>.

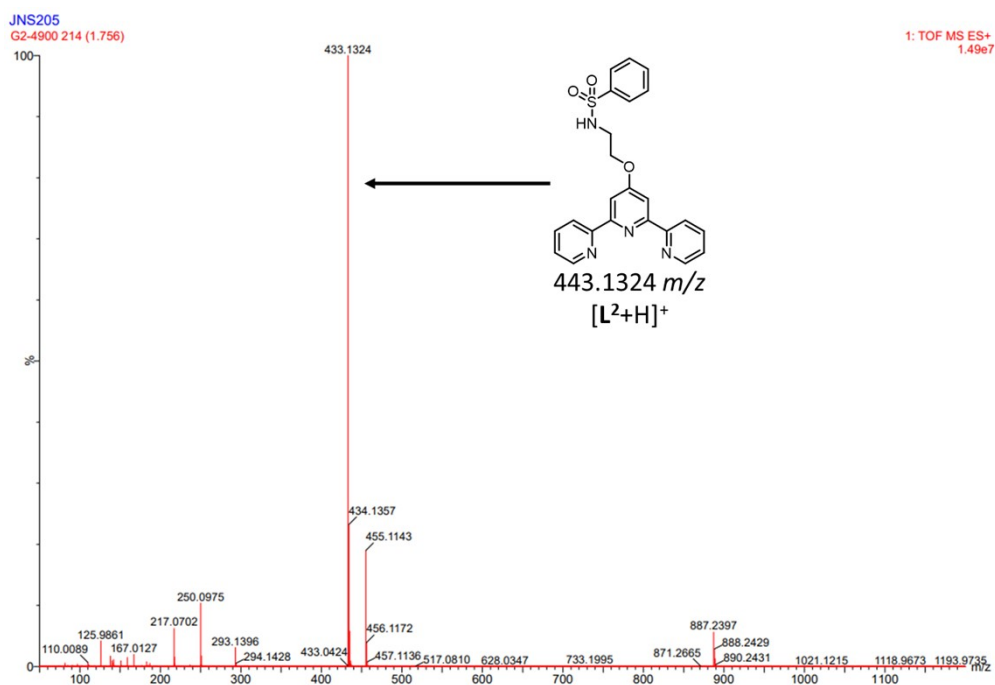

**Figure S19.** High-resolution ESI-MS mass spectrum (positive mode) of L<sup>2</sup>.

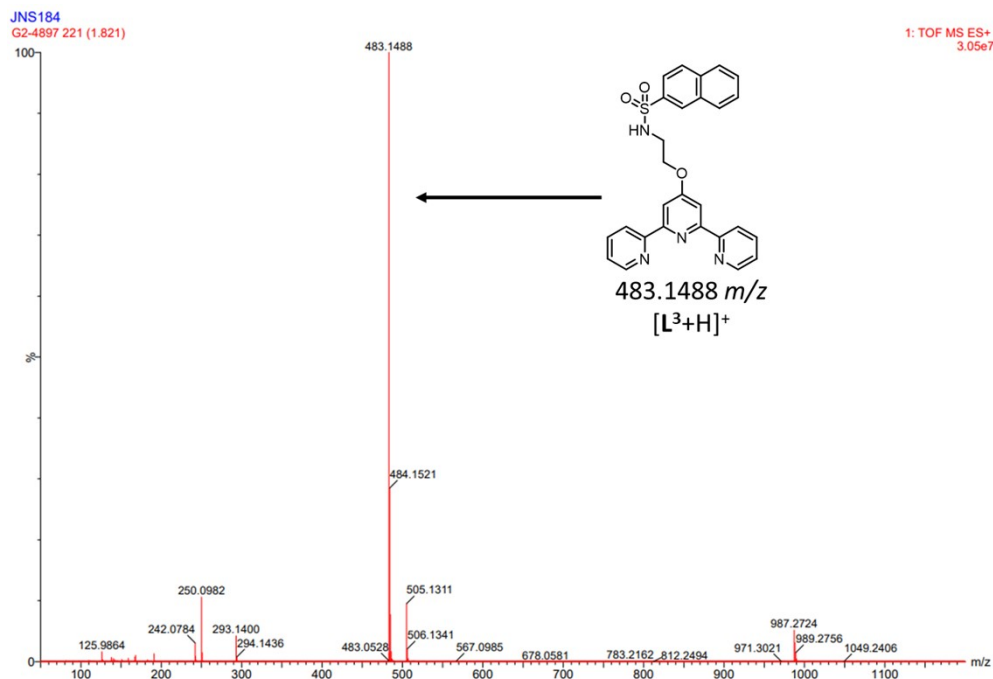

Figure S20. High-resolution ESI-MS mass spectrum (positive mode) of L<sup>3</sup>.

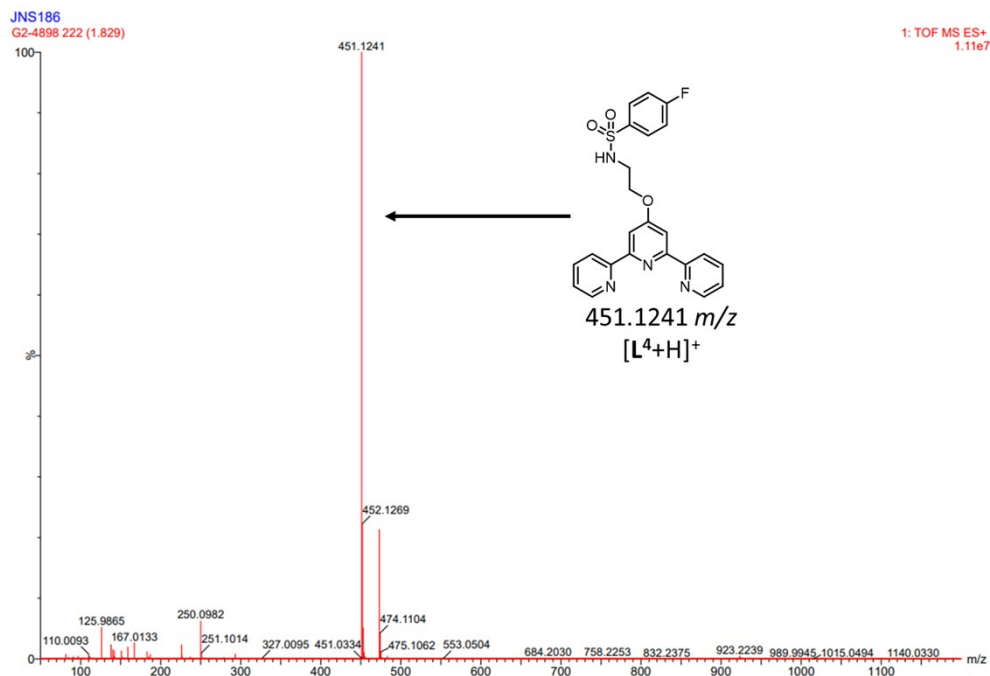

Figure S21. High-resolution ESI-MS mass spectrum (positive mode) of L<sup>4</sup>.

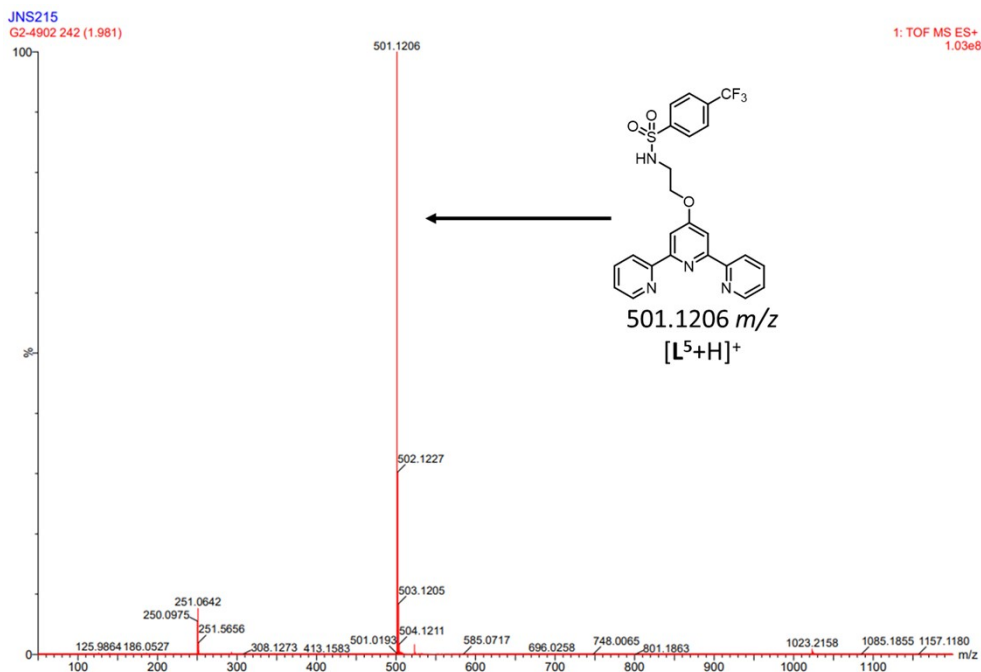

Figure S22. High-resolution ESI-MS mass spectrum (positive mode) of L<sup>5</sup>.

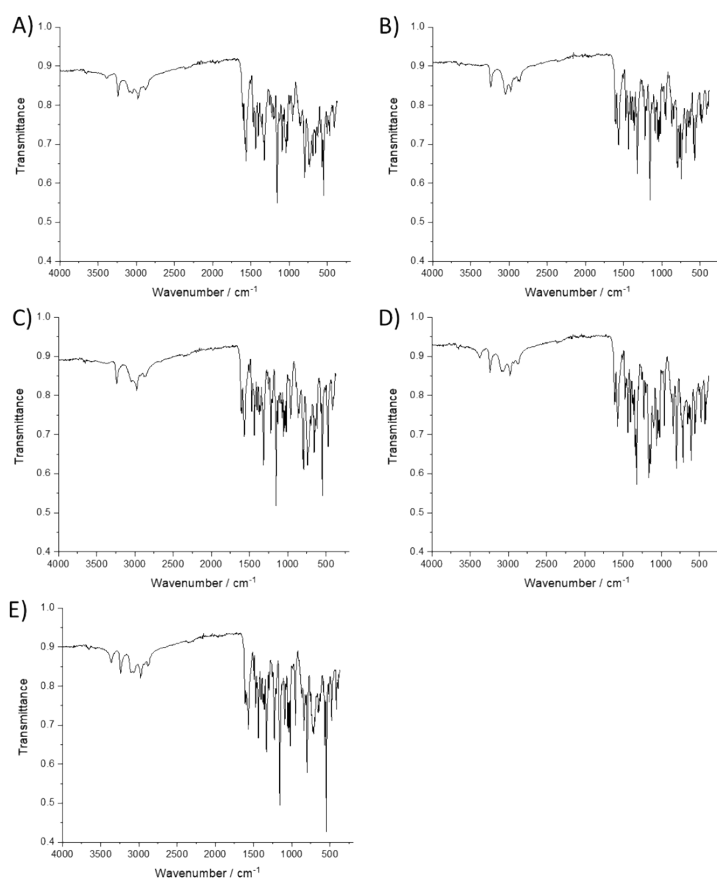

Figure S23. ATR-FTIR spectra of (A) 1, (B) 2, (C) 3, (D) 4, (E) 5 in the solid form.

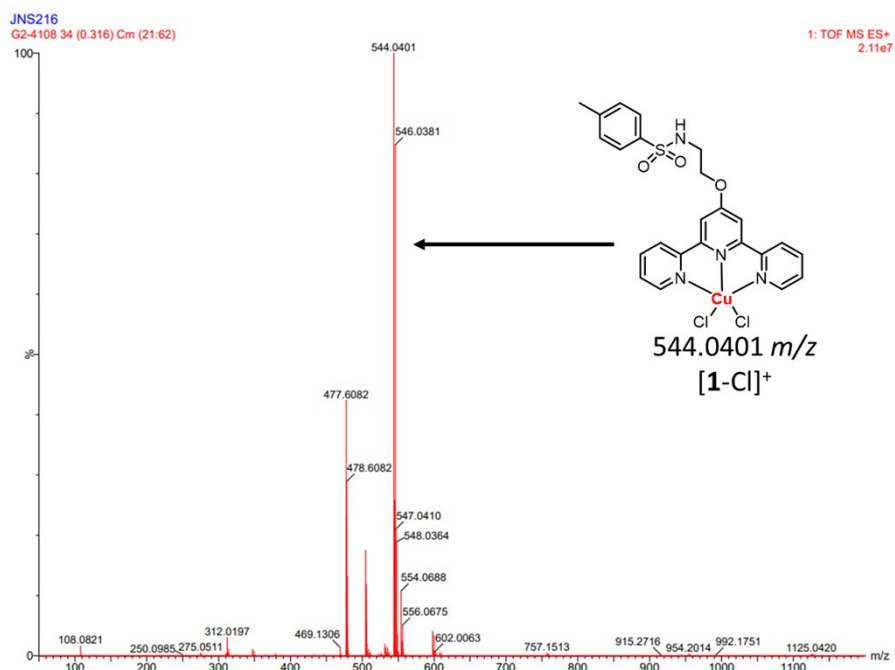

Figure S24. High-resolution ESI-MS mass spectrum (positive mode) of **1**.

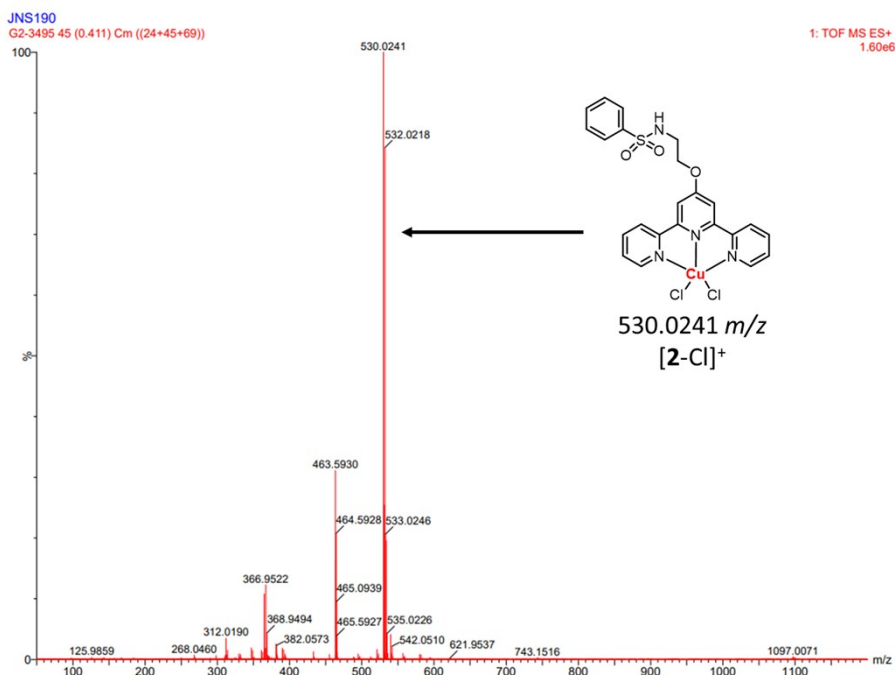

Figure S25. High-resolution ESI-MS mass spectrum (positive mode) of **2**.

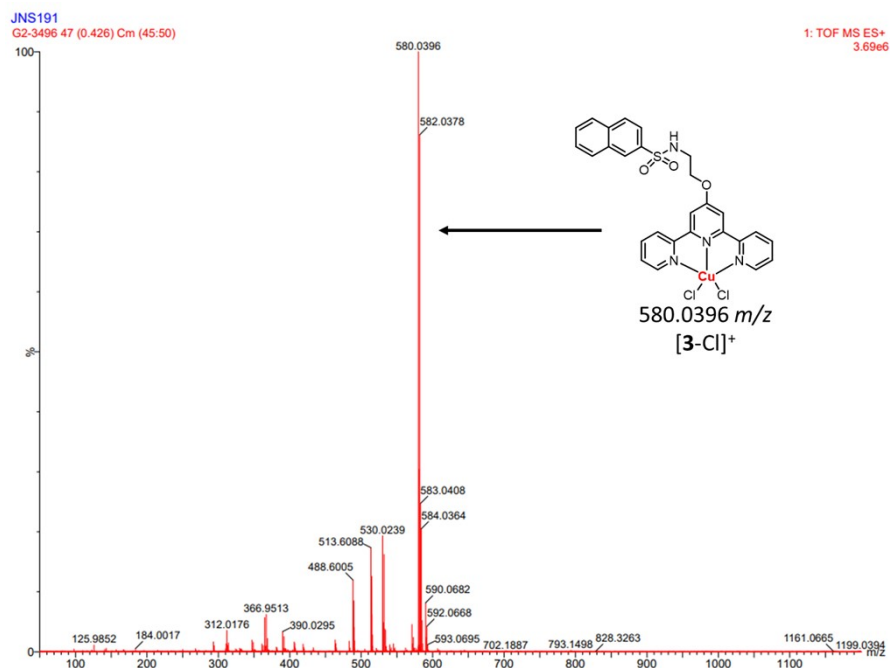

Figure S26. High-resolution ESI-MS mass spectrum (positive mode) of 3.

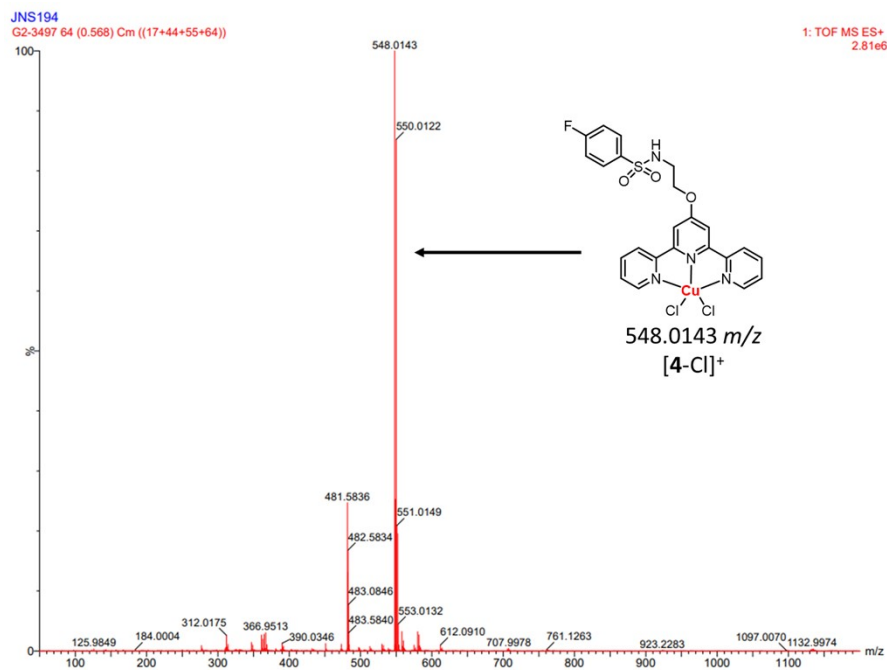

Figure S27. High-resolution ESI-MS mass spectrum (positive mode) of 4.

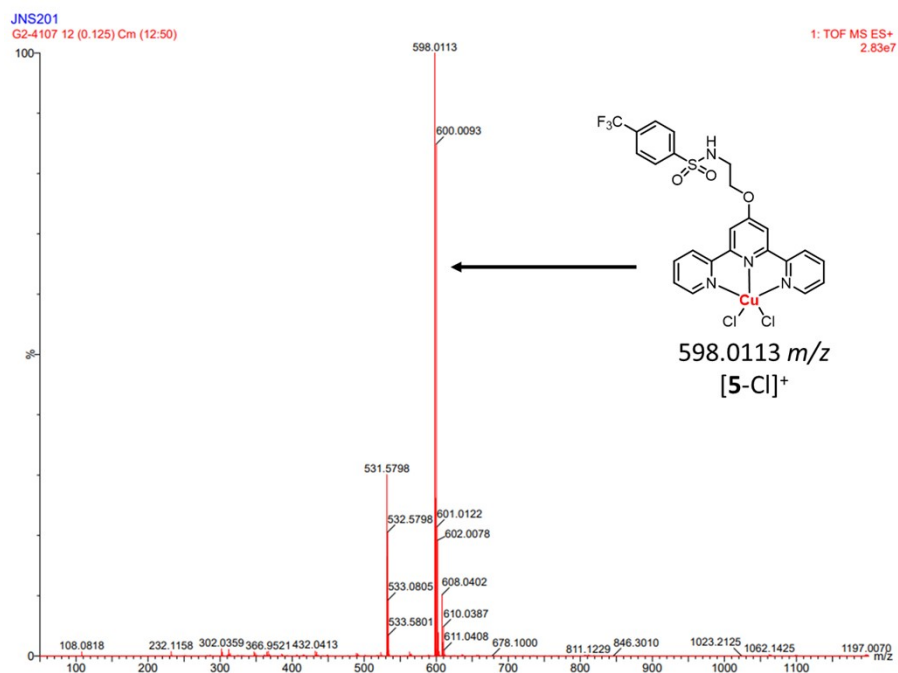

**Figure S28.** High-resolution ESI-MS mass spectrum (positive mode) of **5**.

**Table S1.** Crystallographic data for complexes **1-3**.

| <b>Metal complex</b>                                                         | <b>1</b>                                                                          | <b>2</b>                                                                          | <b>3</b>                                                                                                  |
|------------------------------------------------------------------------------|-----------------------------------------------------------------------------------|-----------------------------------------------------------------------------------|-----------------------------------------------------------------------------------------------------------|
| CCDC No.                                                                     | 2258101                                                                           | 2258099                                                                           | 2258098                                                                                                   |
| formula                                                                      | C <sub>24</sub> H <sub>22</sub> Cl <sub>2</sub> CuN <sub>4</sub> O <sub>3</sub> S | C <sub>23</sub> H <sub>20</sub> Cl <sub>2</sub> CuN <sub>4</sub> O <sub>3</sub> S | C <sub>27</sub> H <sub>22</sub> Cl <sub>2</sub> CuN <sub>4</sub> O <sub>3</sub> S<br>+ CH <sub>3</sub> CN |
| <i>F</i> w                                                                   | 580.95                                                                            | 566.93                                                                            | 658.04                                                                                                    |
| Crystal system                                                               | triclinic                                                                         | orthorhombic                                                                      | triclinic                                                                                                 |
| Space group                                                                  | P-1                                                                               | Pbca                                                                              | P-1                                                                                                       |
| <i>a</i> , Å                                                                 | 7.7408(5)                                                                         | 14.013(3)                                                                         | 7.7290(2)                                                                                                 |
| <i>b</i> , Å                                                                 | 8.5955(6)                                                                         | 13.767(3)                                                                         | 8.4595(2)                                                                                                 |
| <i>c</i> , Å                                                                 | 19.5113(13)                                                                       | 24.041(5)                                                                         | 23.7162(7)                                                                                                |
| <i>α</i> , deg.                                                              | 86.001(3)                                                                         | 90                                                                                | 80.9710(10)                                                                                               |
| <i>β</i> , deg.                                                              | 78.691(3)                                                                         | 90                                                                                | 83.8520(10)                                                                                               |
| <i>γ</i> , deg.                                                              | 72.651(3)                                                                         | 90                                                                                | 69.4890(10)                                                                                               |
| <i>V</i> , Å <sup>3</sup>                                                    | 1215.00(14)                                                                       | 4638.0(18)                                                                        | 1432.07(7)                                                                                                |
| <i>Z</i>                                                                     | 2                                                                                 | 8                                                                                 | 2                                                                                                         |
| <i>D</i> <sub>calcd</sub> , Mg/m <sup>3</sup>                                | 1.588                                                                             | 1.624                                                                             | 1.526                                                                                                     |
| 2 <i>θ</i> / deg.                                                            | 4.618 to 133.532                                                                  | 1.69 to 26.00                                                                     | 7.56 to 144.46                                                                                            |
| Reflections collected                                                        | 28912                                                                             | 34260                                                                             | 45499                                                                                                     |
| Independent reflections                                                      | 4295                                                                              | 4558                                                                              | 5648                                                                                                      |
| Goodness-of-fit on <i>F</i> <sup>2</sup>                                     | 1.077                                                                             | 0.949                                                                             | 1.052                                                                                                     |
| <i>R</i> <sub>1</sub> , w <i>R</i> <sub>2</sub> [ <i>I</i> ≥ 2σ( <i>I</i> )] | 0.0492, 0.1448                                                                    | 0.0419, 0.0909                                                                    | 0.0330, 0.0898                                                                                            |
| <i>R</i> <sub>1</sub> , w <i>R</i> <sub>2</sub> [all data]                   | 0.0518, 0.1476                                                                    | 0.0622, 0.0967                                                                    | 0.0333, 0.0901                                                                                            |

**Table S2.** Crystallographic data for complexes **4-5**.

| <b>Metal complex</b>                                                         | <b>4</b>                                                                                                  | <b>5</b>                                                                                               |
|------------------------------------------------------------------------------|-----------------------------------------------------------------------------------------------------------|--------------------------------------------------------------------------------------------------------|
| CCDC No.                                                                     | 2258097                                                                                                   | 2258100                                                                                                |
| formula                                                                      | $2 \times (\text{C}_{23}\text{H}_{19}\text{Cl}_2\text{CuFN}_4\text{O}_3\text{S}) + 1.5\text{H}_2\text{O}$ | $\text{C}_{24}\text{H}_{19}\text{Cl}_2\text{CuF}_3\text{N}_4\text{O}_3\text{S} + \text{CH}_3\text{CN}$ |
| <i>F</i> <sub>w</sub>                                                        | 1196.87                                                                                                   | 675.98                                                                                                 |
| Crystal system                                                               | triclinic                                                                                                 | triclinic                                                                                              |
| Space group                                                                  | P-1                                                                                                       | P-1                                                                                                    |
| <i>a</i> , Å                                                                 | 8.1461(6)                                                                                                 | 8.3057(6)                                                                                              |
| <i>b</i> , Å                                                                 | 8.5293(7)                                                                                                 | 8.5238(6)                                                                                              |
| <i>c</i> , Å                                                                 | 19.2202(16)                                                                                               | 20.6586(14)                                                                                            |
| <i>α</i> , deg.                                                              | 88.390(3)                                                                                                 | 87.401(2)                                                                                              |
| <i>β</i> , deg.                                                              | 78.390(3)                                                                                                 | 80.917(2)                                                                                              |
| <i>γ</i> , deg.                                                              | 72.100(3)                                                                                                 | 71.980(2)                                                                                              |
| <i>V</i> , Å <sup>3</sup>                                                    | 1243.97(17)                                                                                               | 1373.36(17)                                                                                            |
| <i>Z</i>                                                                     | 1                                                                                                         | 2                                                                                                      |
| <i>D</i> <sub>calcd</sub> , Mg/m <sup>3</sup>                                | 1.598                                                                                                     | 1.635                                                                                                  |
| 2 <i>θ</i> / deg.                                                            | 4.696 to 110.08                                                                                           | 4.332 to 144.638                                                                                       |
| Reflections collected                                                        | 14856                                                                                                     | 20455                                                                                                  |
| Independent reflections                                                      | 3111                                                                                                      | 5383                                                                                                   |
| Goodness-of-fit on <i>F</i> <sup>2</sup>                                     | 1.037                                                                                                     | 1.118                                                                                                  |
| <i>R</i> <sub>1</sub> , w <i>R</i> <sub>2</sub> [ <i>I</i> ≥ 2σ( <i>I</i> )] | 0.0631, 0.1592                                                                                            | 0.0540, 0.1460                                                                                         |
| <i>R</i> <sub>1</sub> , w <i>R</i> <sub>2</sub> [all data]                   | 0.0720, 0.1712                                                                                            | 0.0562, 0.1480                                                                                         |



**Table S3.** Selected bond lengths (Å) for complexes **1-5**.

| Bond        | <b>1</b>  | <b>2</b>   | <b>3</b>    | <b>4</b>   | <b>5</b>  |
|-------------|-----------|------------|-------------|------------|-----------|
| Cu(1)-N(2)  | 1.942(2)  | 1.957(3)   | 1.9364 (14) | 1.941(4)   | 1.940(3)  |
| Cu(1)-N(3)  | 2.033(2)  | 2.047(3)   | 2.0304 (15) | 2.046(4)   | 2.048(3)  |
| Cu(1)-N(1)  | 2.032(2)  | 2.053(3)   | 2.0294 (15) | 2.035(4)   | 2.044(3)  |
| Cu(1)-Cl(1) | 2.2352(7) | 2.2428(9)  | 2.2344(5)   | 2.2366(14) | 2.2348(9) |
| Cu(1)-Cl(2) | 2.6405(8) | 2.4525(10) | 2.7519(5)   | 2.6012(15) | 2.5643(9) |

**Table S4.** Selected bond angles (°) for complexes **1-5**.

| Bond angle        | <b>1</b>   | <b>2</b>   | <b>3</b>   | <b>4</b>   | <b>5</b>   |
|-------------------|------------|------------|------------|------------|------------|
| N(2)-Cu(1)-N(3)   | 79.99(9)   | 78.99(10)  | 79.61(6)   | 79.99(16)  | 79.24(11)  |
| N(2)-Cu(1)-N(1)   | 79.63(9)   | 78.75(10)  | 80.28(6)   | 79.56(16)  | 79.71(11)  |
| N(3)-Cu(1)-N(1)   | 158.98(10) | 155.16(10) | 159.58(6)  | 159.01(16) | 157.95(11) |
| N(2)-Cu(1)-Cl(1)  | 169.64(7)  | 162.51(8)  | 172.37(5)  | 169.19(13) | 167.08(8)  |
| N(3)-Cu(1)-Cl(1)  | 99.25(7)   | 98.92(8)   | 100.33(4)  | 99.52(12)  | 99.70(8)   |
| N(1)-Cu(1)-Cl(1)  | 99.87(7)   | 98.99(8)   | 99.13(4)   | 99.67(13)  | 99.33(8)   |
| N(2)-Cu(1)-Cl(2)  | 83.78(7)   | 94.63(8)   | 79.65(4)   | 87.10(12)  | 89.39(8)   |
| N(3)-Cu(1)-Cl(2)  | 92.60(7)   | 93.55(7)   | 87.51(4)   | 92.91(12)  | 91.63(8)   |
| N(1)-Cu(1)-Cl(2)  | 90.24(7)   | 99.08(7)   | 92.37(4)   | 90.76(12)  | 94.64(8)   |
| Cl(1)-Cu(1)-Cl(2) | 106.59(3)  | 102.84(3)  | 107.97(18) | 103.70(5)  | 103.52(3)  |

**Table S5.** Experimentally determined LogP values for copper(II)-terpyridine complexes **1-5** and Cu(2,2';6',2''-terpyridine)Cl<sub>2</sub>.

| Copper(II)-terpyridine complex | LogP value   |
|--------------------------------|--------------|
| <b>1</b>                       | -1.83 ± 0.09 |
| <b>2</b>                       | -1.96 ± 0.03 |
| <b>3</b>                       | -1.71 ± 0.08 |
| <b>4</b>                       | -2.18 ± 0.16 |
| <b>5</b>                       | -2.27 ± 0.04 |
| Cu(terpy)Cl <sub>2</sub>       | -2.01 ± 0.08 |

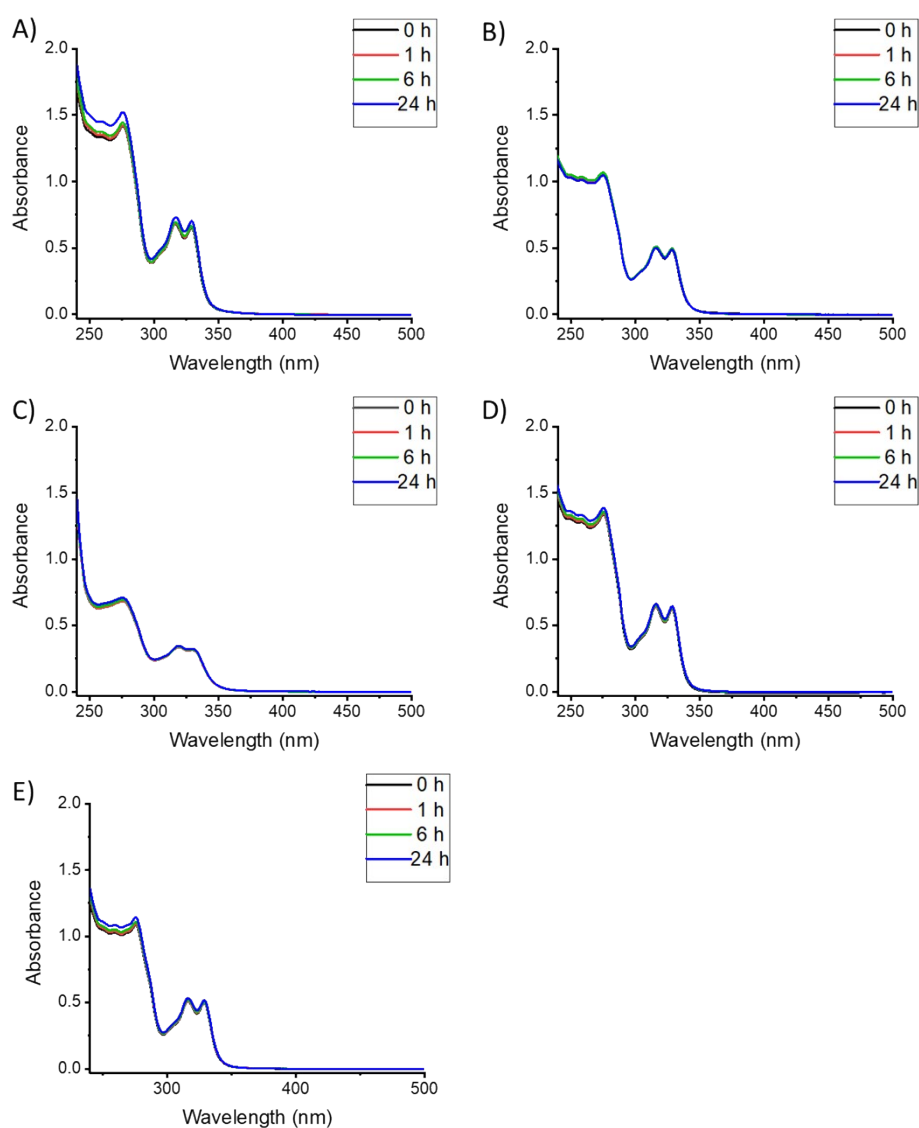

**Figure S29.** UV-Vis spectra of **1-5** (A-E) (all 50 μM) in PBS:DMSO (200:1) over the course of 24 h at 37 °C.

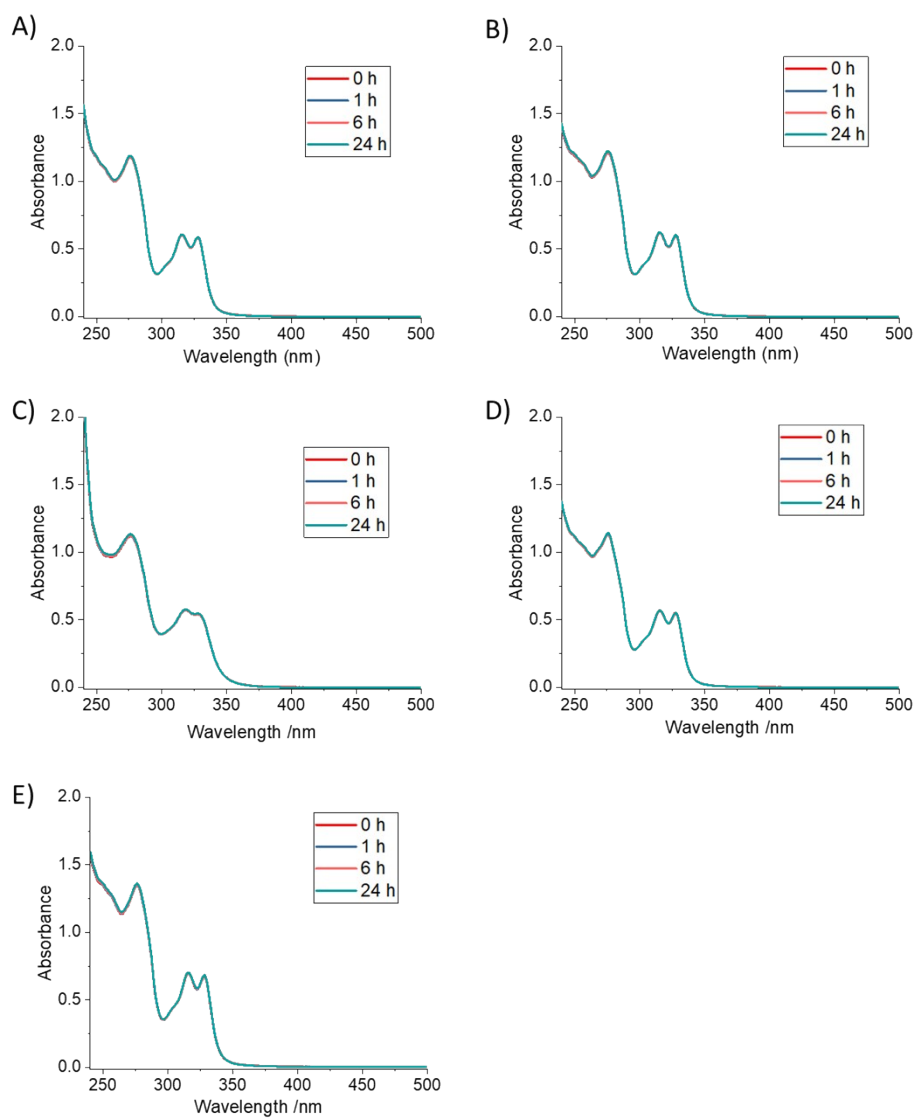

**Figure S30.** UV-Vis spectra of **1-5** (A-E) (all 50  $\mu\text{M}$ ) in  $\text{H}_2\text{O}:\text{DMSO}$  (200:1) over the course of 24 h at 37  $^\circ\text{C}$ .

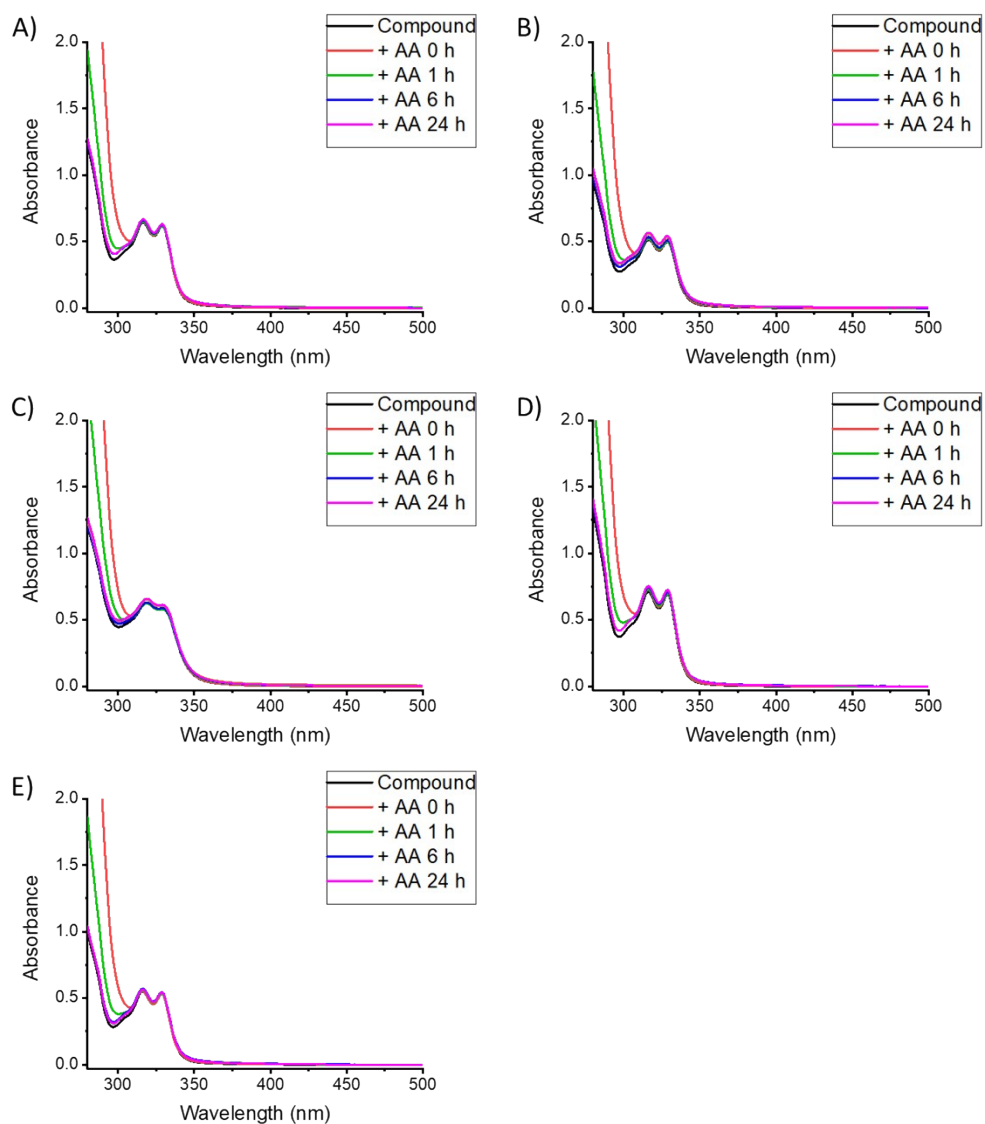

**Figure S31.** UV-Vis spectra of **1-5** (A-E) (all 50  $\mu\text{M}$ ) in PBS:DMSO (200:1) in the presence of ascorbic acid (0.5 mM) over the course of 24 h at 37  $^{\circ}\text{C}$ .

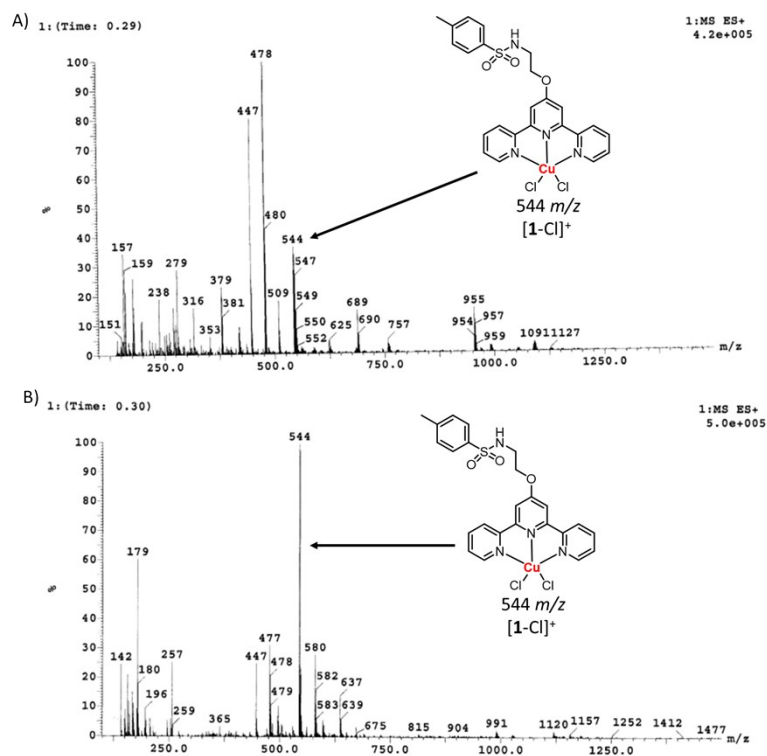

**Figure S32.** ESI mass spectra (positive mode) of **1** (500  $\mu$ M) in H<sub>2</sub>O:DMSO (5:1) in the presence of (A) ascorbic acid (5 mM) or (B) glutathione (5 mM) after incubation for 24 h at 37  $^{\circ}$ C.

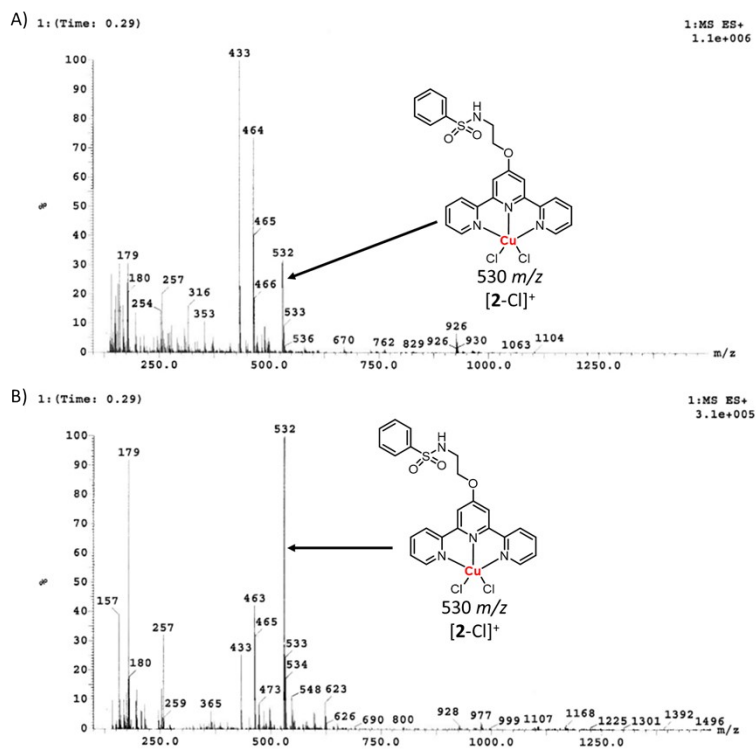

**Figure S33.** ESI mass spectra (positive mode) of **2** (500  $\mu$ M) in H<sub>2</sub>O:DMSO (5:1) in the presence of (A) ascorbic acid (5 mM) or (B) glutathione (5 mM) after incubation for 24 h at 37  $^{\circ}$ C.

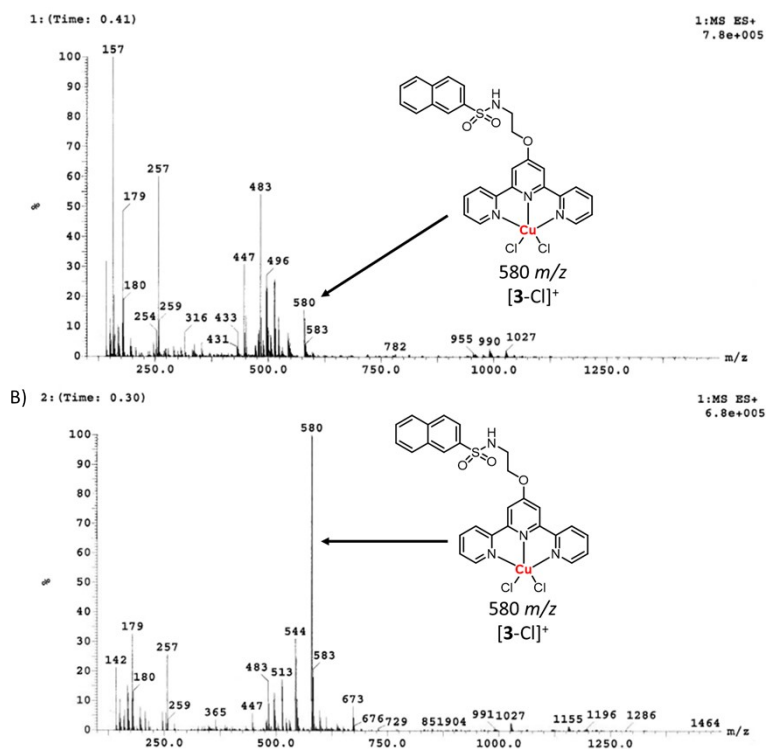

**Figure S34.** ESI mass spectra (positive mode) of **3** (500  $\mu\text{M}$ ) in  $\text{H}_2\text{O}:\text{DMSO}$  (5:1) in the presence of (A) ascorbic acid (5 mM) or (B) glutathione (5 mM) after incubation for 24 h at 37  $^\circ\text{C}$ .

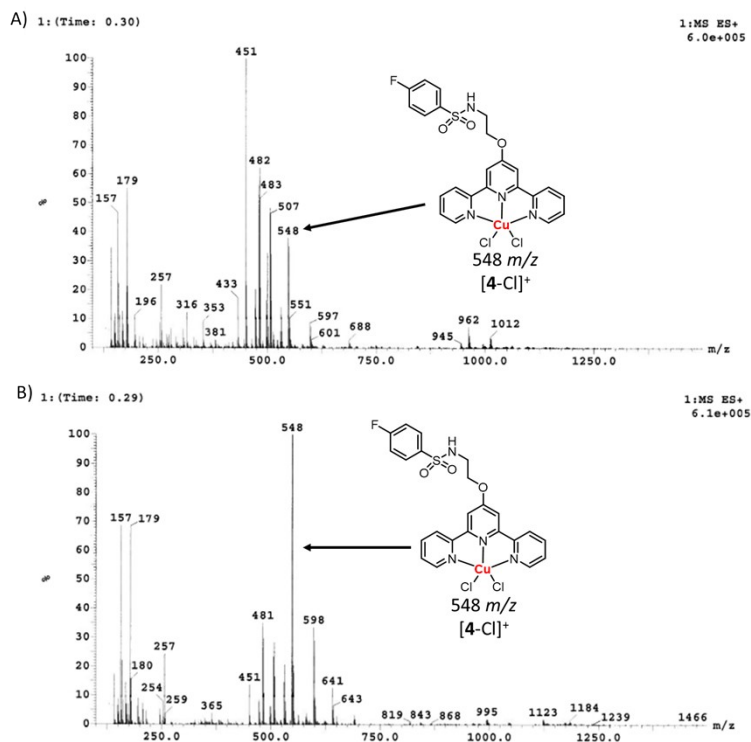

**Figure S35.** ESI mass spectra (positive mode) of **4** (500  $\mu\text{M}$ ) in  $\text{H}_2\text{O}:\text{DMSO}$  (5:1) in the presence of (A) ascorbic acid (5 mM) or (B) glutathione (5 mM) after incubation for 24 h at 37  $^\circ\text{C}$ .

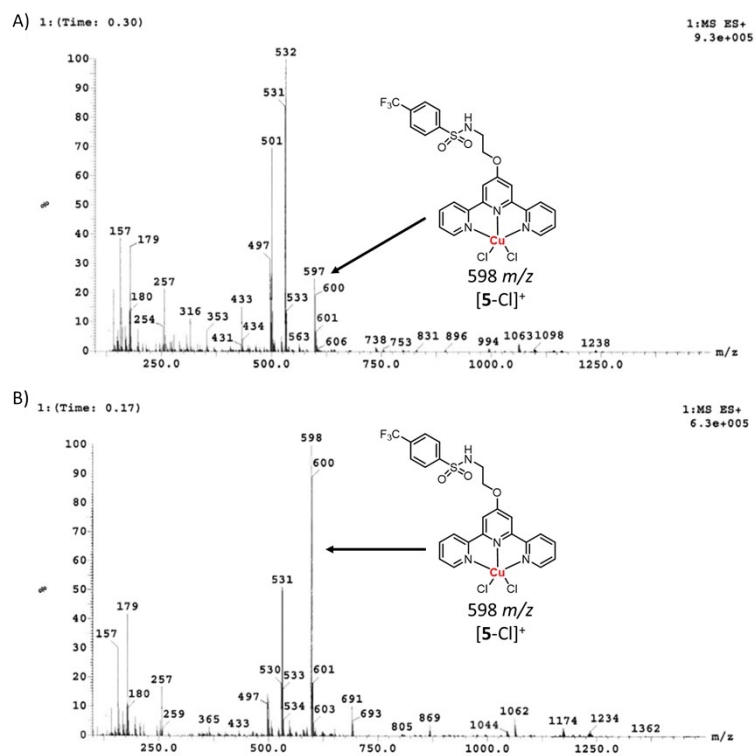

**Figure S36.** ESI mass spectra (positive mode) of **5** (500  $\mu$ M) in H<sub>2</sub>O:DMSO (5:1) in the presence of (A) ascorbic acid (5 mM) or (B) glutathione (5 mM) after incubation for 24 h at 37  $^{\circ}$ C.

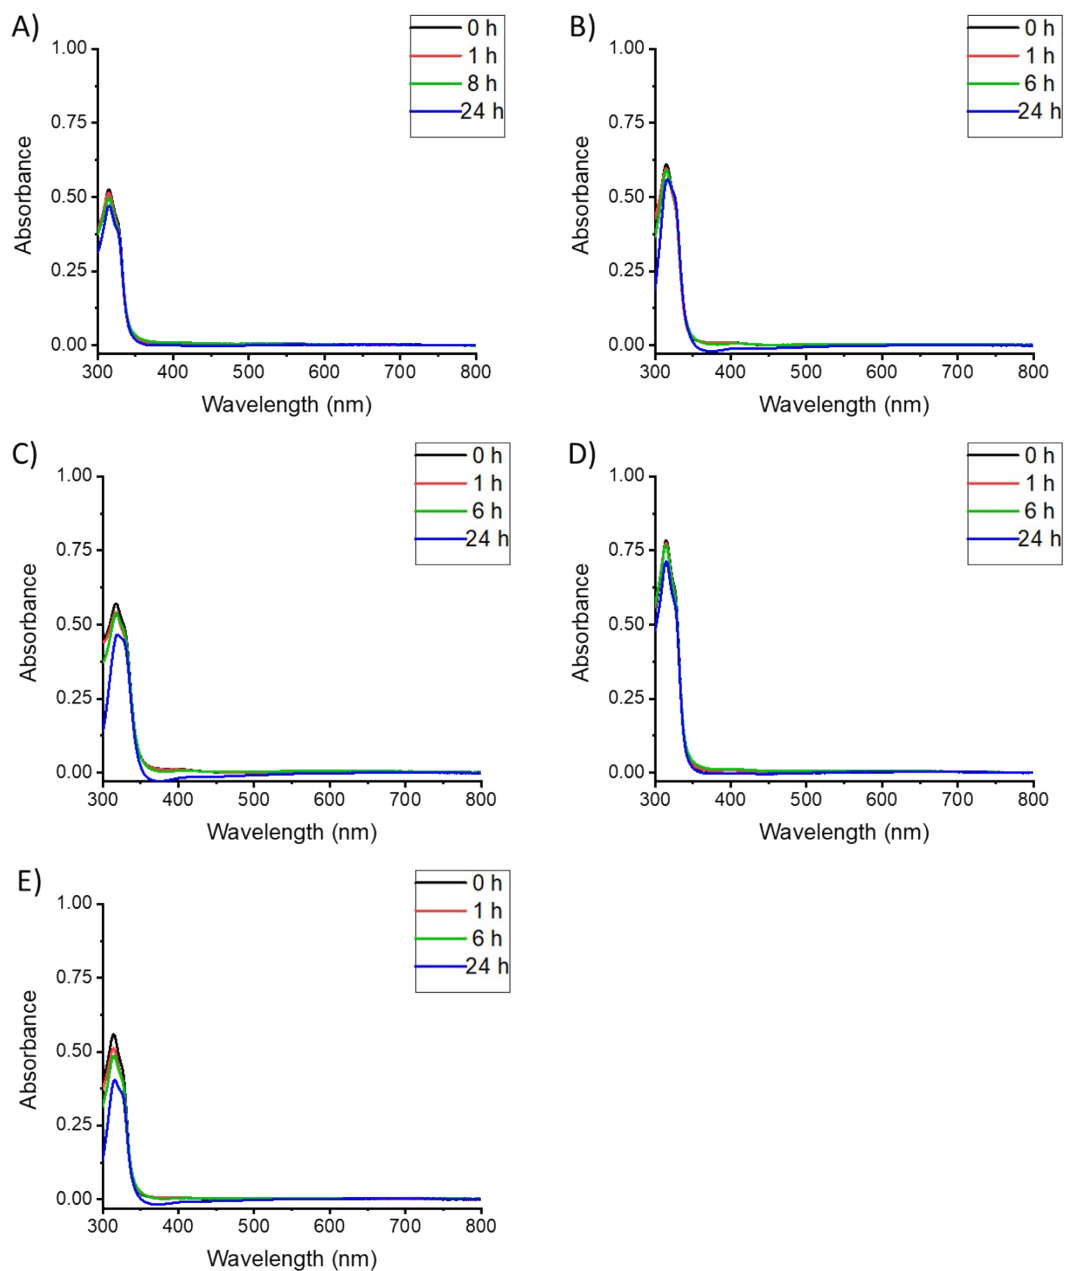

**Figure S37.** UV-Vis spectra of **1-5** (A-E) (all 50  $\mu\text{M}$ ) in Mammary Epithelial Cell Growth Medium (MEGM):DMSO (200:1) over the course of 24 h at 37  $^{\circ}\text{C}$ .



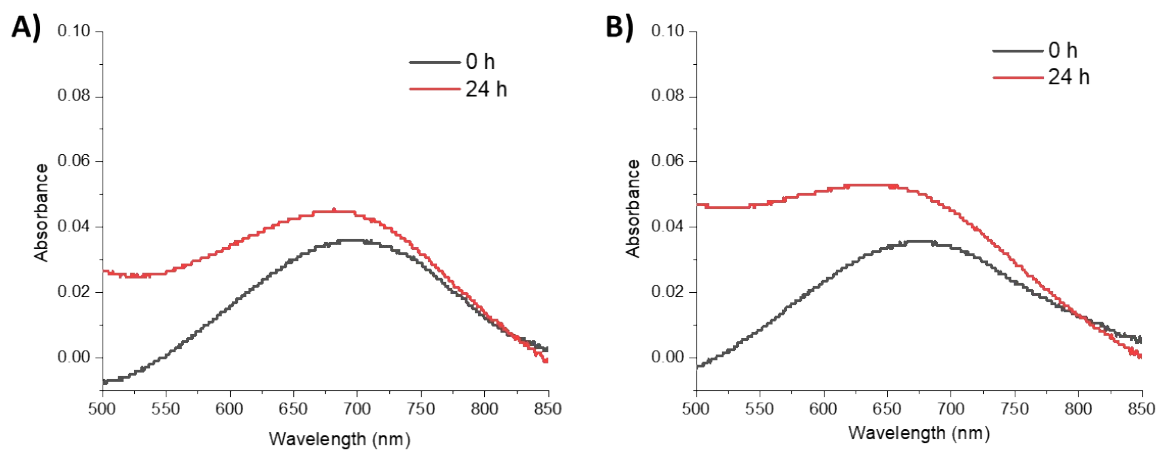

**Figure S38.** UV-Vis spectra of **1** (0.5 mM) in (A) PBS:DMSO (10:1) and (B) Mammary Epithelial Cell Growth Medium (MEGM):DMSO (10:1) before and after incubation at 37 °C for 24 h.

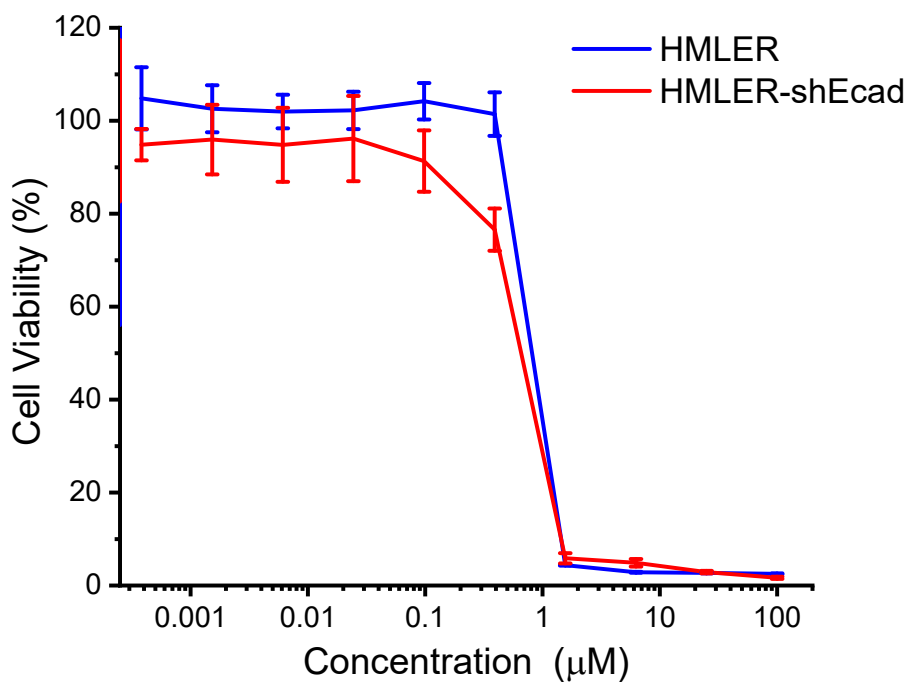

**Figure S39.** Representative dose-response curves for the treatment of HMLER and HMLER-shEcad cells with **1** after 72 h incubation.

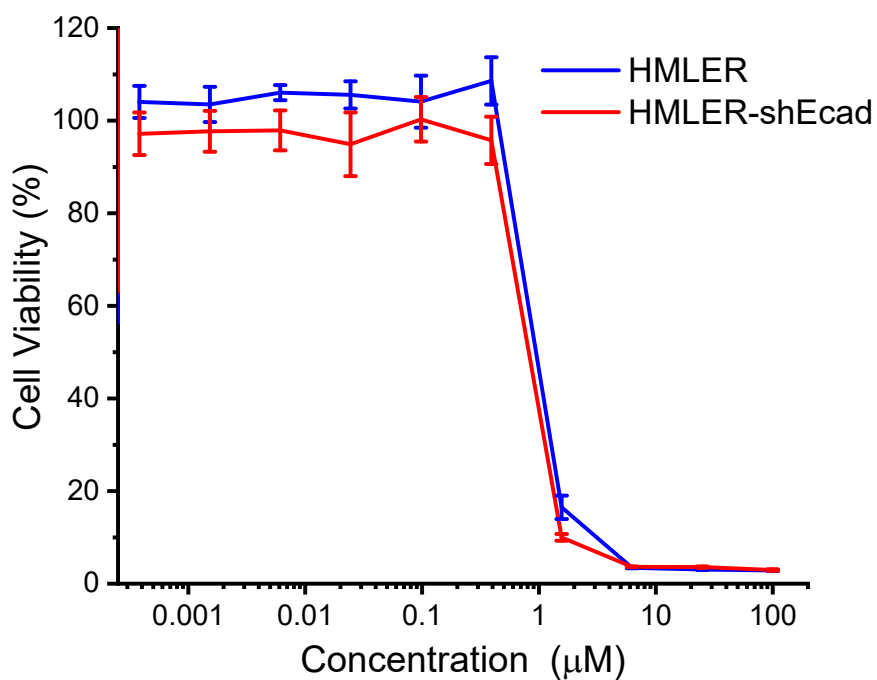

**Figure S40.** Representative dose-response curves for the treatment of HMLER and HMLER-shEcad cells with **2** after 72 h incubation.

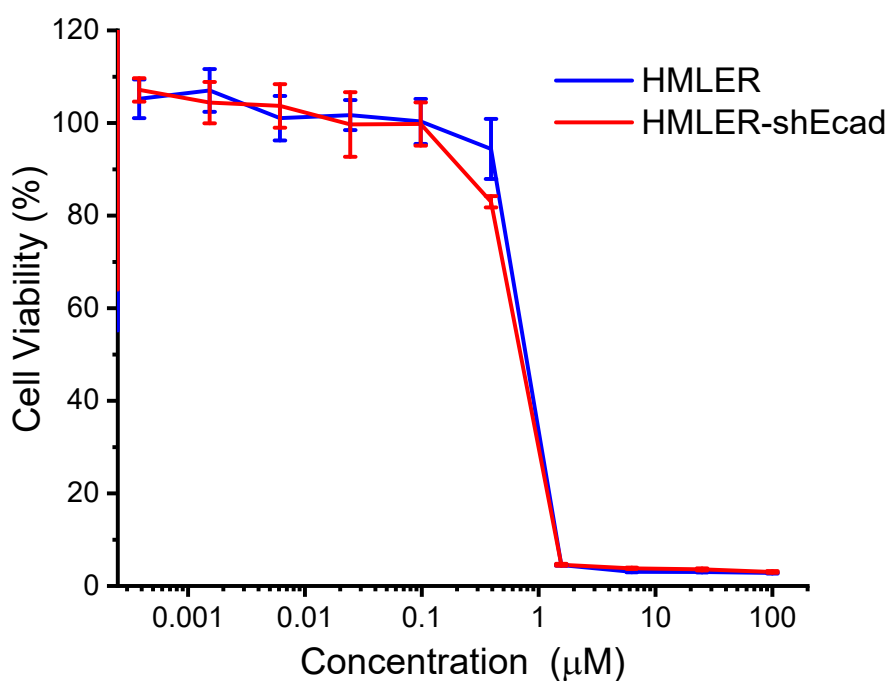

**Figure S41.** Representative dose-response curves for the treatment of HMLER and HMLER-shEcad cells with **3** after 72 h incubation.

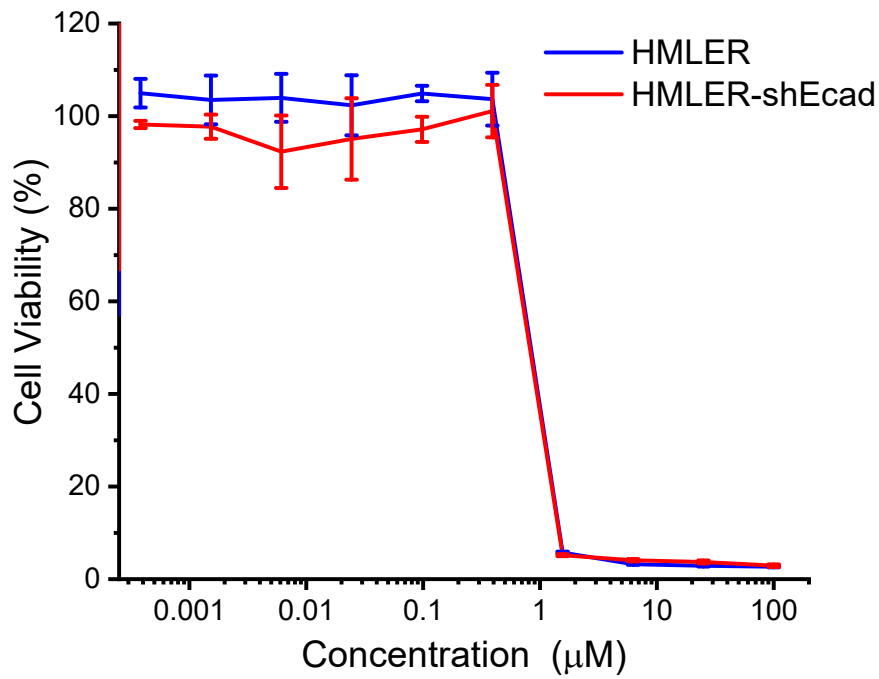

**Figure S42.** Representative dose-response curves for the treatment of HMLER and HMLER-shEcad cells with **4** after 72 h incubation.

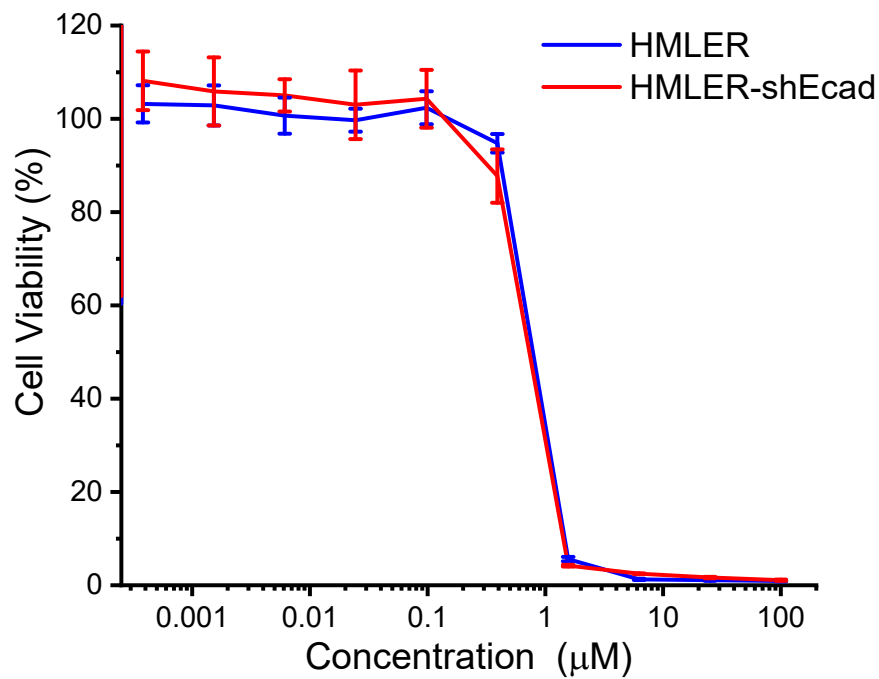

**Figure S43.** Representative dose-response curves for the treatment of HMLER and HMLER-shEcad cells with **5** after 72 h incubation.

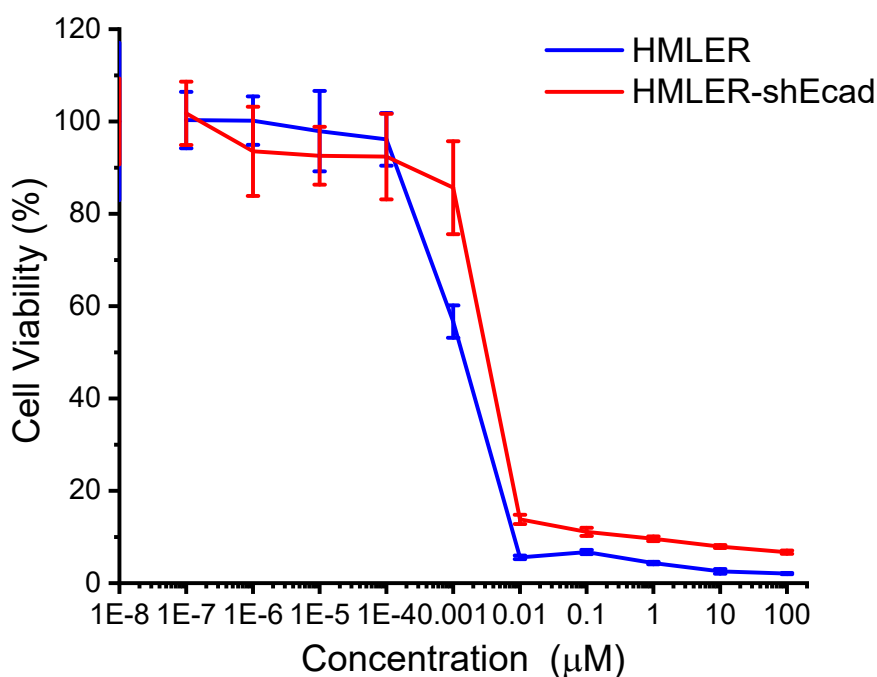

**Figure S44.** Representative dose-response curves for the treatment of HMLER and HMLER-shEcad cells with gemcitabine after 72 h incubation.

**Table S6.** IC<sub>50</sub> values of the gemcitabine, 5-fluorouracil, capecitabine, and carboplatin against HMLER and HMLER-shEcad cells. <sup>a</sup> Determined after 72 h incubation (mean of three independent experiments ± SD). <sup>b</sup> Reported in reference [1].

| Compound                    | HMLER [μM] <sup>a</sup> | HMLER-shEcad [μM] <sup>a</sup> |
|-----------------------------|-------------------------|--------------------------------|
| gemcitabine                 | 0.0014 ± 0.0002         | 0.0031 ± 0.0003                |
| 5-fluorouracil <sup>b</sup> | 41.05 ± 5.30            | 49.10 ± 5.94                   |
| capecitabine <sup>b</sup>   | > 100                   | > 100                          |
| carboplatin <sup>b</sup>    | 67.31 ± 2.80            | 72.39 ± 7.99                   |

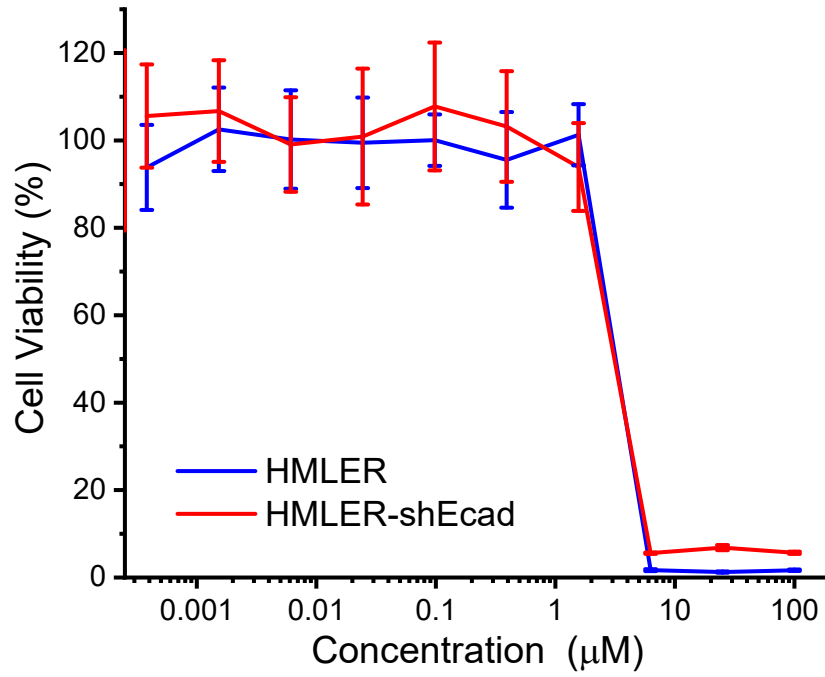

**Figure S45.** Representative dose-response curves for the treatment of HMLER and HMLER-shEcad cells with L<sup>1</sup> after 72 h incubation.

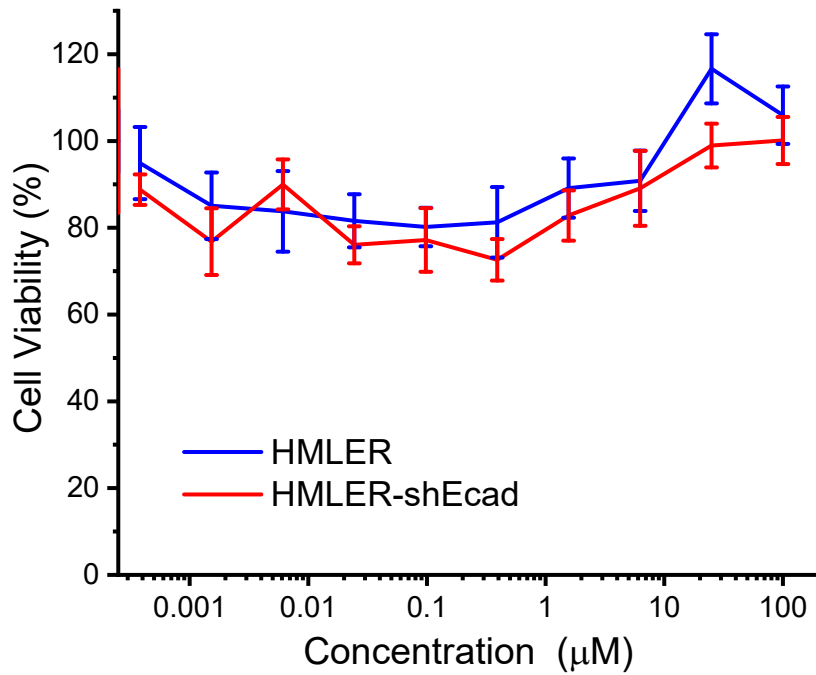

**Figure S46.** Representative dose-response curves for the treatment of HMLER and HMLER-shEcad cells with copper nitrate after 72 h incubation.

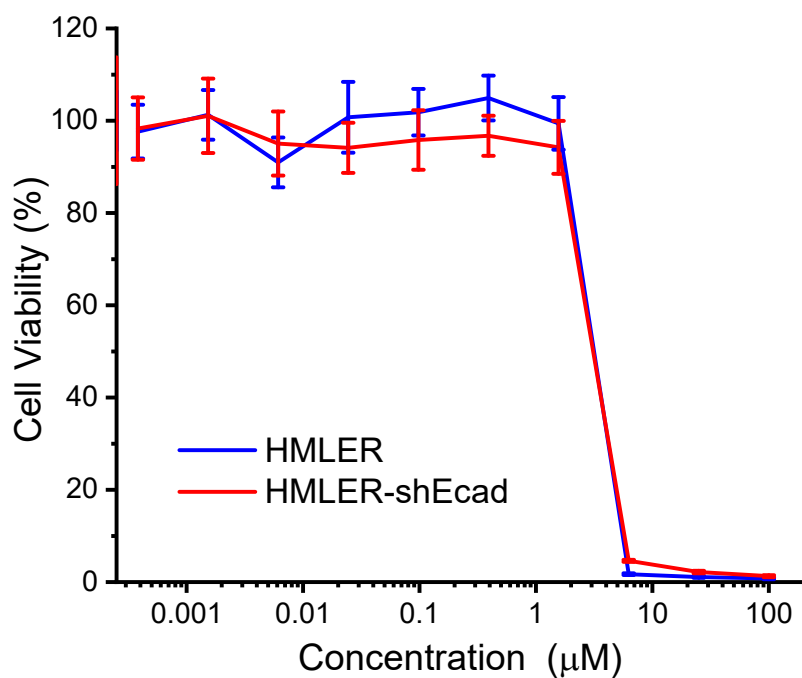

**Figure S47.** Representative dose-response curves for the treatment of HMLER and HMLER-shEcad cells with Cu(2,2';6',2''-terpyridine)Cl<sub>2</sub> after 72 h incubation.

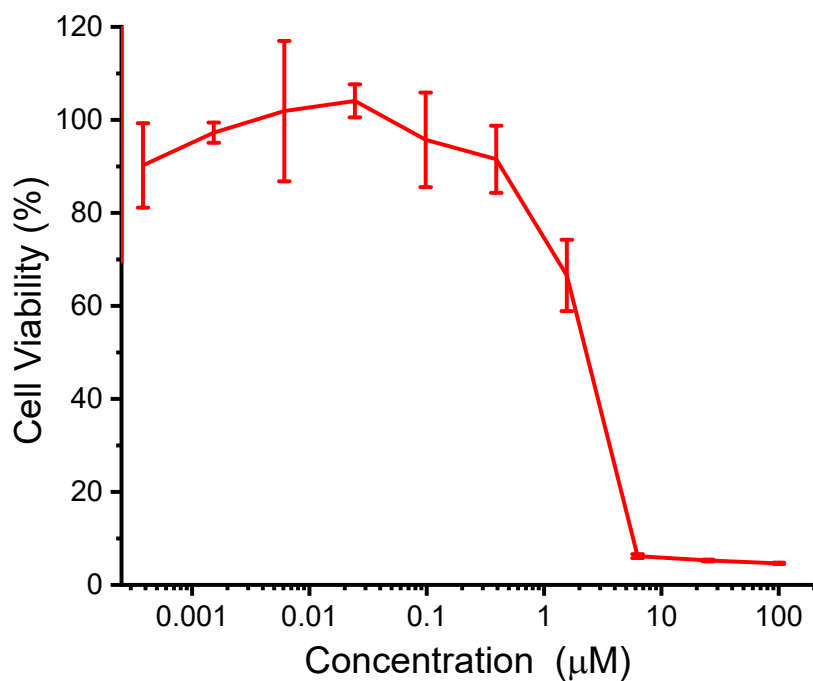

**Figure S48.** Representative dose-response curves for the treatment of HMLER-shEcad cells with L<sup>1</sup> + CuCl<sub>2</sub> (1:1) after 72 h incubation.

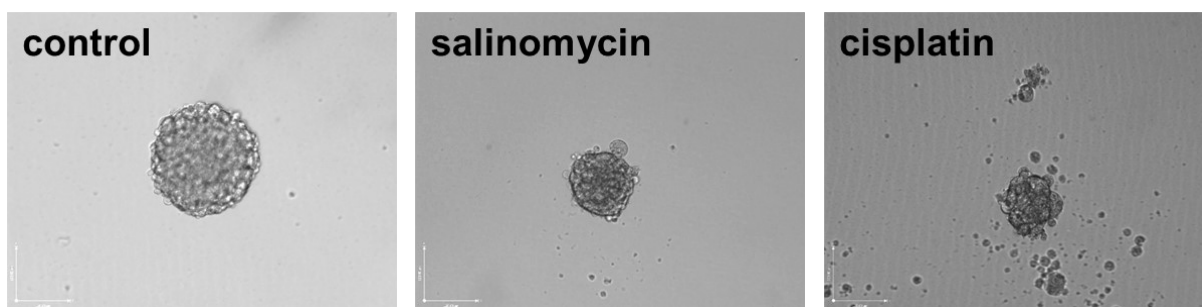

**Figure S49.** Representative bright-field images ( $\times 10$ ) of HMLER-shEcad spheroids in the absence and presence of salinomycin or cisplatin at their  $IC_{20}$  value (5 days incubation).

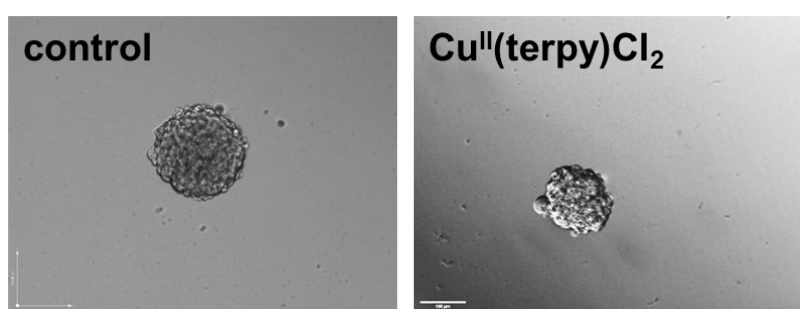

**Figure S50.** Representative bright-field images ( $\times 10$ ) of HMLER-shEcad spheroids in the absence and presence of  $Cu(2,2';6',2''\text{-terpyridine})Cl_2$  at its  $IC_{20}$  value (5 days incubation).

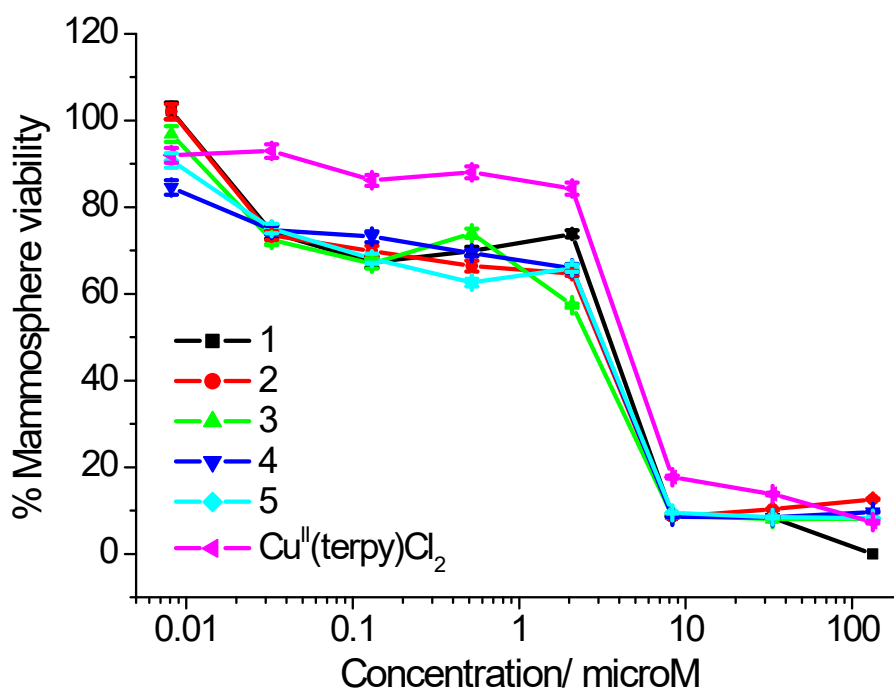

**Figure S51.** Representative dose-response curves for the treatment of HMLER-shEcad mammospheres with 1-5 or  $Cu(2,2';6',2''\text{-terpyridine})Cl_2$  after 5 days incubation. Error bars = SD.

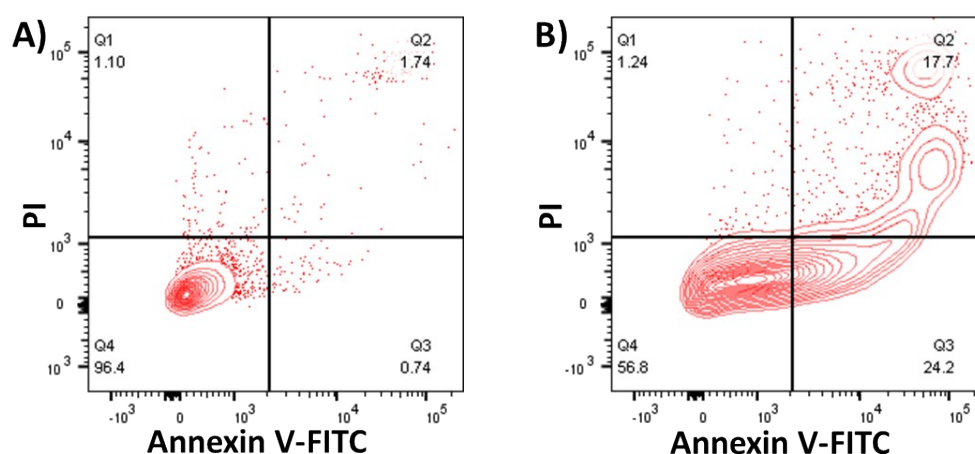

**Figure S52.** FITC Annexin V-propidium iodide binding assay plots of (A) untreated HMLER-shEcad cells and (B) HMLER-shEcad cells treated with cisplatin (25  $\mu$ M for 48 h).

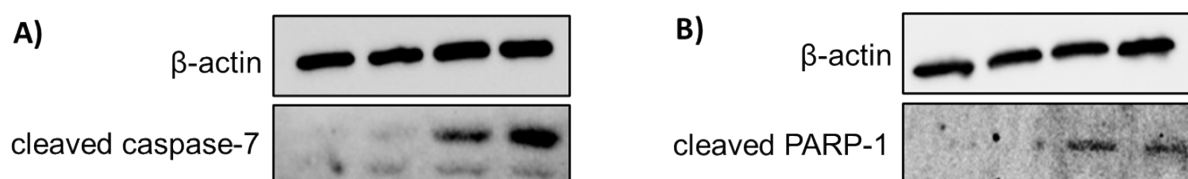

**Figure S53.** Immunoblotting analysis of proteins related to the apoptosis pathway. Protein expression in HMLER-shEcad cells untreated and treated with (A) **1** (0.4, 0.8, and 1.6  $\mu$ M for 24 h) or (B) **1** (0.4, 0.8, and 1.6  $\mu$ M for 48 h).

## Reference

1. A. Johnson, C. Olelewe, J. H. Kim, J. Northcote-Smith, R. T. Mertens, G. Passeri, K. Singh, S. G. Awuah and K. Suntharalingam, *Chem. Sci.*, 2023, **14**, 557-565.
